# Supplementary material
Source: PubMed Central journal article supplement (PMC1308902)
Supplement: pnas_0506840102_5.pdf [file pnas_0506840102_5.pdf]

Table 2. *Y. pestis* differential gene expression during primary pneumonic plague

| Chromosome*          | Systematic           | Common           | Function                                                       | Code <sup>†</sup> | Fold change <sup>‡</sup> | SD <sup>§</sup> |
|----------------------|----------------------|------------------|----------------------------------------------------------------|-------------------|--------------------------|-----------------|
| YPO0008 <sup>¶</sup> | YPO0008 <sup>¶</sup> | rbsK             | ribokinase                                                     | 1.A.1             | -3.334                   | 0.130           |
| YPO0013              | YPO0013              | mobA, mob, chlB  | molybdopterin-guanine dinucleotide biosynthesis protein A      | 1.G.4             | 4.162                    | 0.221           |
| YPO0024              | YPO0024              | glnA             | glutamine synthetase                                           | 1.D.1             | 5.800                    | 0.205           |
| YPO0026              | YPO0026              | bipA, typA       | putative GTPase                                                | 4.1               | 2.306                    | 0.254           |
| YPO0038              | YPO0038              | spoT             | guanosine-3',5'-bisbis(diphosphate) 3'-pyrophosphydrolase      | 2                 | 3.651                    | 0.663           |
| YPO0042              | YPO0042              | ----             | putative membrane protein                                      | 3.C.1             | 2.359                    | 0.199           |
| YPO0063              | YPO0063              | ----             | putative membrane protein                                      | 3.C.1             | 2.308                    | 0.234           |
| YPO0108              | YPO0108              | cytR             | transcriptional repressor                                      | 2                 | -4.257                   | 3.004           |
| YPO0114              | YPO0114              | metJ             | transcriptional repressor protein                              | 2                 | 2.363                    | 0.124           |
| YPO0115              | YPO0115              | metB             | cystathionine gamma-synthase (pseudogene)                      | 1.D.2             | 5.068                    | 0.022           |
| YPO0116              | YPO0116              | metL, metM       | bifunctional aspartokinase/homoserine dehydrogenase II         | 1.D.2             | 3.052                    | 0.187           |
| YPO0117              | YPO0117              | metF             | 5,10-methylenetetrahydrofolate reductase                       | 1.D.2             | 14.101                   | 2.274           |
| YPO0131              | YPO0131              | ----             | conserved hypothetical protein                                 | 5.1               | -3.775                   | 0.230           |
| YPO0132              | YPO0132              | feoB             | ferrous iron transport protein B                               | 3.C.1             | -2.754                   | 0.073           |
| YPO0133              | YPO0133              | feoA             | hypothetical ferrous iron transport protein A                  | 5.1               | -3.218                   | 0.197           |
| YPO0159              | YPO0159              | nirC             | putative nitrite transporter                                   | 4.A.5             | 3.205                    | 0.575           |
| YPO0160              | YPO0160              | nirD             | nitrite reductase [NAD]                                        | 1.B.7.b           | 5.573                    | 0.380           |
| YPO0163              | YPO0163              | ----             | conserved integral membrane protein                            | 3.C.1             | 2.245                    | 0.203           |
| YPO0190              | YPO0190              | ----             | conserved hypothetical protein                                 | 5.1               | 3.336                    | 0.582           |
| YPO0231              | YPO0231              | rpsM             | 30S ribosomal protein S13                                      | 3.A.2             | 2.140                    | 0.192           |
| YPO0250              | YPO0250              | ----             | putative hydrolase (pseudogene)                                | 5.1               | -2.969                   | 0.262           |
| YPO0251              | YPO0251              | ----             | putative transmembrane transport protein                       | 3.C.1             | -3.387                   | 0.053           |
| YPO0252              | YPO0252              | ----             | putative membrane protein                                      | 3.C.1             | -3.482                   | 0.678           |
| YPO0253              | YPO0253              | acs              | acetyl-coenzyme A synthetase                                   | 1.A.1             | -3.483                   | 0.535           |
| YPO0261              | YPO0261              | ----             | putative type III secretion apparatus                          | 4.A.6             | 9.348                    | 0.787           |
| YPO0278              | YPO0278              | metC             | cystathionine beta-lyase                                       | 1.D.2             | -2.429                   | 0.528           |
| YPO0284              | YPO0284              | ----             | conserved hypothetical protein                                 | 5.1               | 2.985                    | 0.330           |
| YPO0286              | YPO0286              | ----             | putative coproporphyrinogen III oxidase                        | 1.G.12            | 3.422                    | 0.397           |
| YPO0301              | YPO0301              | ----             | putative exported protein                                      | 3.C.1             | -2.917                   | 0.292           |
| YPO0343              | YPO0343              | hydN             | 4Fe-4S ferredoxin                                              | 1.B.7.b           | 3.073                    | 1.077           |
| YPO0348              | YPO0348              | aspA             | aspartate ammonia-lyase                                        | 1.D.2             | -7.051                   | 0.240           |
| YPO0357              | YPO0357              | frdD, b4151      | fumarate reductase hydrophobic protein                         | 1.B.7.b           | -2.931                   | 0.164           |
| YPO0358              | YPO0358              | frdC, b4152      | fumarate reductase hydrophobic protein                         | 1.B.7.b           | -3.314                   | 0.361           |
| YPO0359              | YPO0359              | frdB, b4153      | fumarate reductase iron-sulfur protein                         | 1.B.7.b           | -2.673                   | 0.336           |
| YPO0378              | YPO0378              | purA, adeK       | adenylosuccinate synthetase                                    | 1.F.1             | 2.290                    | 0.208           |
| YPO0407              | YPO0407              | ----             | conserved hypothetical protein                                 | 5.1               | -5.068                   | 0.434           |
| YPO0408              | YPO0408              | ----             | putative aldolase                                              | 5.1               | -3.782                   | 0.149           |
| YPO0409              | YPO0409              | ----             | putative periplasmic solute-binding protein                    | 4.A               | -3.936                   | 0.173           |
| YPO0411              | YPO0411              | ----             | putative ABC transporter permease protein                      | 4.A               | -2.244                   | 0.027           |
| YPO0412              | YPO0412              | ----             | putative ABC transporter ATP-binding protein                   | 4.A               | -2.180                   | 0.136           |
| YPO0417              | YPO0417              | ----             | putative O-antigen biosynthesis protein                        | 3.C.1             | 3.672                    | 0.115           |
| YPO0424              | YPO0424              | ----             | putative pectinesterase                                        | 3.C.1             | -3.921                   | 0.910           |
| YPO0426              | YPO0426              | ----             | putative membrane protein                                      | 3.C.1             | 5.333                    | 0.434           |
| YPO0434              | YPO0434              | ----             | putative metalloenzyme                                         | 5.1               | 3.556                    | 0.204           |
| YPO0448              | YPO0448              | ----             | putative lipoprotein                                           | 3.C.1             | 2.499                    | 0.106           |
| YPO0449              | YPO0449              | ----             | putative exported protein                                      | 3.C.1             | 2.459                    | 0.242           |
| YPO0458              | YPO0458              | arcA, dye, fexA  | aerobic respiration control protein                            | 2                 | 2.413                    | 0.168           |
| YPO0465              | YPO0465              | ----             | putative transport protein                                     | 4.A               | 6.264                    | 0.990           |
| YPO0473              | YPO0473              | ----             | hypothetical protein                                           | 5.1               | 4.013                    | 0.955           |
| YPO0498              | YPO0498              | ----             | hypothetical protein                                           | 5.1               | -2.134                   | 0.049           |
| YPO0531              | YPO0531              | leuC             | 3-isopropylmalate dehydratase large subunit                    | 1.D.6             | 2.534                    | 0.533           |
| YPO0539              | YPO0539              | ilvI             | acetolactate synthase isozyme III large subunit                | 1.D.6             | 3.739                    | 0.428           |
| YPO0540              | YPO0540              | ilvH             | acetolactate synthase isozyme III small subunit                | 1.D.6             | 2.635                    | 0.453           |
| YPO0544              | YPO0544              | ----             | putative membrane protein                                      | 3.C.1             | -4.913                   | 0.680           |
| YPO0569a             | YPO0569a             | ----             | conserved hypothetical protein                                 | 5.1               | -2.256                   | 0.016           |
| YPO0570              | YPO0570              | yqjD             | putative membrane protein                                      | 3.C.1             | -3.140                   | 0.086           |
| YPO0579              | YPO0579              | uxaC             | uronate isomerase                                              | 1.A.1             | 3.062                    | 0.548           |
| YPO0584              | YPO0584              | ----             | putative symporter protein                                     | 4.A               | -2.229                   | 0.026           |
| YPO0588              | YPO0588              | ----             | putative methyltransferase                                     | 5.1               | -2.378                   | 0.003           |
| YPO0589              | YPO0589              | fadH, fadH1      | 2,4-dienoyl-CoA reductase                                      | 1.A               | -2.494                   | 0.239           |
| YPO0590              | YPO0590              | hdeD             | putative membrane protein                                      | 3.C.1             | -4.173                   | 0.294           |
| YPO0628              | YPO0628              | ----             | putative translational inhibitor protein                       | 5.1               | -2.384                   | 0.297           |
| YPO0711              | YPO0711              | fliM             | putative flagellar motor switch protein                        | 4.D               | 8.055                    | 0.959           |
| YPO0727              | YPO0727              | flgF             | putative flagellar basal-body rod protein (pseudogene)         | 4.D               | -2.721                   | 0.352           |
| YPO0728              | YPO0728              | flgG             | putative flagellar basal-body rod protein                      | 4.D               | -2.484                   | 0.257           |
| YPO0781              | YPO0781              | ----             | putative surface structure protein (pseudo)                    | 3.C.3             | -2.632                   | 0.242           |
| YPO0819              | YPO0819              | ----             | putative carbonic anhydrase                                    | 5.1               | -3.445                   | 0.330           |
| YPO0854              | YPO0854              | ----             | putative maltodextrin permease protein                         | 4.A.3             | 5.798                    | 0.148           |
| YPO0858              | YPO0858              | ----             | sugar transport ATP-binding protein                            | 4.A.3             | -2.651                   | 0.203           |
| YPO0862              | YPO0862              | ----             | putative exported protein                                      | 3.C.1             | 3.086                    | 0.228           |
| YPO0914              | YPO0914              | serA             | D-3-phosphoglycerate dehydrogenase                             | 1.D.3             | 2.948                    | 0.250           |
| YPO0929              | YPO0929              | speA             | biosynthetic arginine decarboxylase                            | 1.E               | 3.575                    | 0.740           |
| YPO0931              | YPO0931              | metK             | S-adenosylmethionine synthetase                                | 1.C               | 9.450                    | 0.665           |
| YPO0932              | YPO0932              | ----             | conserved hypothetical protein                                 | 5.1               | 3.191                    | 0.123           |
| YPO0959              | YPO0959              | ----             | putative sugar ABC transporter periplasmic binding protein     | 4.A.3             | -3.331                   | 1.344           |
| YPO0988              | YPO0988              | ----             | putative membrane protein                                      | 3.C.1             | 2.306                    | 0.256           |
| YPO1011              | YPO1011              | ----             | putative TonB-dependent outer membrane receptor                | 3.C               | 2.356                    | 0.452           |
| YPO1041              | YPO1041              | dapD             | 2,3,4,5-tetrahydropyridine-2-carboxylate N-succinyltransferase | 1.D.2             | -2.660                   | 0.019           |
| YPO1058              | YPO1058              | rhB, b0183       | ribonuclease HII                                               | 3.B.1             | 2.315                    | 0.152           |
| YPO1069              | YPO1069              | ----             | conserved hypothetical protein                                 | 5.1               | 2.345                    | 0.306           |
| YPO1071              | YPO1071              | ----             | putative lipoprotein                                           | 3.C.1             | 4.216                    | 0.120           |
| YPO1072              | YPO1072              | ----             | ABC transporter permease protein                               | 4.A               | 3.337                    | 0.067           |
| YPO1073              | YPO1073              | abc              | ABC transporter ATP-binding protein                            | 4.A               | 2.827                    | 0.791           |
| YPO1084              | YPO1084              | ----             | conserved hypothetical protein (pseudogene)                    | 5.1               | 2.315                    | 0.216           |
| YPO1108              | YPO1108              | gltA, gltT, icdB | citrate synthase GltA                                          | 1.B.3             | -2.102                   | 0.014           |

|          |                     |                                                                                          |         |         |        |
|----------|---------------------|------------------------------------------------------------------------------------------|---------|---------|--------|
| YPO1109  | sdhC, cybA          | succinate dehydrogenase cytochrome b-556 subunit                                         | 1.B.3   | -2.720  | 0.026  |
| YPO1110  | sdhD                | succinate dehydrogenase hydrophobic membrane anchor protein                              | 1.B.3   | -3.132  | 0.093  |
| YPO1112  | sdhB                | succinate dehydrogenase iron-sulfur protein                                              | 1.B.3   | -2.174  | 0.184  |
| YPO1113  | sucA                | 2-oxoglutarate dehydrogenase E1 component                                                | 1.B.3   | -2.493  | 0.288  |
| YPO1116  | sucD                | succinyl-CoA synthetase alpha chain                                                      | 1.B.3   | -2.348  | 0.171  |
| YPO1184  | ----                | putative ABC transport membrane permease                                                 | 4.A.6   | 11.055  | 2.659  |
| YPO1187  | ----                | putative substrate-binding periplasmic transport protein                                 | 4.A     | 35.300  | 2.832  |
| YPO1201  | ----                | putative amino acid decarboxylase                                                        | 1.A.2   | -2.609  | 0.568  |
| YPO1207  | katA                | catalase                                                                                 | 4.G     | -3.033  | 0.009  |
| YPO1221  | ----                | putative membrane protein                                                                | 3.C.1   | 3.003   | 0.055  |
| YPO1244  | ----                | hypothetical protein                                                                     | 5.I     | 4.372   | 1.405  |
| YPO1255  | ----                | hypothetical protein                                                                     | 5.I     | -4.052  | 0.513  |
| YPO1275  | spr                 | putative lipoprotein                                                                     | 3.C.1   | -2.730  | 0.123  |
| YPO1277  | ----                | putative cobalamin synthesis protein                                                     | 5.I     | -3.222  | 1.578  |
| YPO1290  | ----                | putative aldehyde dehydrogenase                                                          | 1.A.1   | -4.122  | 1.251  |
| YPO1301  | psaE                | putative regulatory protein                                                              | 2       | -5.645  | 0.004  |
| YPO1302  | psaF                | putative membrane protein                                                                | 3.C.1   | -4.713  | 0.481  |
| YPO1303  | psaA                | pH 6 antigen precursor (antigen 4) (adhesin)                                             | 3.C.2   | -11.980 | 0.428  |
| YPO1304  | psaB                | chaperone protein PsaB precursor                                                         | 4.B     | -5.514  | 3.176  |
| YPO1308  | ----                | putative LysR-family transcriptional regulatory protein                                  | 2       | -3.140  | 0.282  |
| YPO1316  | ----                | putative iron/ascorbate oxidoreductase family protein                                    | 5.I     | 10.036  | 3.116  |
| YPO1321  | sdaC, dcrA, b2796   | serine transporter                                                                       | 4.A.1   | -7.524  | 0.312  |
| YPO1331  | potF                | putrescine-binding periplasmic protein precursor                                         | 4.A.1   | 3.513   | 0.543  |
| YPO1332  | potG                | putrescine transport ATP-binding protein                                                 | 4.A.1   | 7.279   | 1.771  |
| YPO1343  | ----                | putative periplasmic binding protein                                                     | 4.A     | 28.117  | 10.914 |
| YPO1344  | ----                | FecCD transport family protein                                                           | 4.A     | 10.106  | 1.743  |
| YPO1345  | ----                | putative transport ATP-binding protein                                                   | 4.A     | 3.590   | 0.483  |
| YPO1366  | cspD, cspH          | cold shock-like protein                                                                  | 5.F     | -8.897  | 1.135  |
| YPO1384  | focA                | putative formate transporter 1                                                           | 4.A.3   | 2.066   | 0.089  |
| YPO1386  | ansB                | putative L-asparaginase II precursor                                                     | 1.A.2   | 2.285   | 0.171  |
| YPO1392  | rpsA, ssyF          | 30S ribosomal protein S1                                                                 | 3.A.2   | 2.274   | 0.296  |
| YPO1398  | cspB                | cold shock-like protein                                                                  | 5.F     | 5.260   | 0.128  |
| YPO1411  | ----                | putative outer membrane porin C protein                                                  | 3.C     | 2.684   | 0.138  |
| YPO1413  | pncB                | putative nicotinate phosphoribosyltransferase                                            | 1.G.7   | 2.164   | 0.188  |
| YPO1423a | rmf                 | putative ribosome modulation factor                                                      | 3.A.3   | -4.360  | 0.330  |
| YPO1430  | fabA                | 3-hydroxydecanoyl-[acyl-carrier-protein] dehydratase                                     | 1.H     | -2.126  | 0.095  |
| YPO1501  | ----                | putative esterase                                                                        | 5.I     | -2.559  | 0.387  |
| YPO1507  | mglB                | galactose-binding protein                                                                | 4.A.3   | -3.862  | 0.134  |
| YPO1508  | mglA                | galactoside transport ATP-binding protein                                                | 4.A.3   | -3.461  | 0.301  |
| YPO1512  | cdd                 | cytidine deaminase                                                                       | 1.F.4   | 7.792   | 0.718  |
| YPO1516  | ----                | hypothetical protein                                                                     | 5.I     | 4.588   | 0.296  |
| YPO1517  | ----                | putative sugar ABC transporter                                                           | 4.A.3   | 7.545   | 0.736  |
| YPO1542  | hisI, hisIE         | histidine biosynthesis bifunctional protein [includes: phosphoribosyl-amp cyclohydrolase | 1.D.5   | 3.740   | 0.502  |
| YPO1543  | hisF                | histidine biosynthetic protein (cyclase)                                                 | 1.D.5   | 4.228   | 0.182  |
| YPO1544  | hisA                | phosphoribosylformimino-5-aminoimidazole carboxamide ribotide isomerase                  | 1.D.5   | 3.364   | 0.884  |
| YPO1546  | hisB                | histidinol-phosphatase and imidazoleglycerol-phosphate dehydratase                       | 1.D.5   | 3.755   | 0.944  |
| YPO1547  | hisC                | histidinol-phosphate aminotransferase                                                    | 1.D.5   | 5.059   | 1.524  |
| YPO1549  | hisG                | ATP phosphoribosyltransferase                                                            | 1.D.5   | 4.381   | 1.233  |
| YPO1563  | ----                | putative transmembrane transporter                                                       | 4.A     | -3.021  | 0.890  |
| YPO1565  | ----                | putative oxidoreductase                                                                  | 5.I     | -3.063  | 0.270  |
| YPO1566  | ----                | putative hydrolase                                                                       | 5.I     | -4.120  | 1.241  |
| YPO1572  | ----                | putative sugar transporter                                                               | 4.A.3   | -3.997  | 0.777  |
| YPO1573  | ----                | putative polysaccharide deacetylase                                                      | 5.I     | -8.028  | 0.018  |
| YPO1576  | ----                | putative GerR-family transcriptional regulatory protein                                  | 2       | 6.723   | 1.619  |
| YPO1617  | ndh                 | NADH dehydrogenase                                                                       | 1.B.7.c | 2.205   | 0.220  |
| YPO1649  | ----                | conserved hypothetical protein                                                           | 5.I     | -3.094  | 0.113  |
| YPO1683  | ----                | probable N-acetylmuramoyl-L-alanine amidase                                              | 3.B.3   | -2.176  | 0.174  |
| YPO1698  | ----                | putative exported protein                                                                | 3.C.1   | -3.168  | 1.532  |
| YPO1699  | ----                | putative exported protein                                                                | 3.C.1   | -5.613  | 0.440  |
| YPO1700  | ----                | putative exported protein                                                                | 3.C.1   | -6.033  | 0.890  |
| YPO1718  | ----                | putative exported protein                                                                | 3.C.1   | -5.511  | 1.047  |
| YPO1728  | ----                | putative transcriptional regulator of sugar transport (pseudogene)                       | 2       | -2.284  | 0.018  |
| YPO1758  | manX, ptsL, gptB    | PTS system, mannose-specific IIAB component                                              | 4.A.3   | 3.003   | 0.212  |
| YPO1771  | sdaA                | L-serine dehydratase                                                                     | 1.A.2   | -4.156  | 0.229  |
| YPO1799  | flgB, flbA, fla FII | flagellar basal-body rod protein FlgB                                                    | 4.D     | 8.529   | 2.599  |
| YPO1847  | yecS                | putative amino-acid ABC transporter (permease)                                           | 4.A.1   | 3.010   | 0.934  |
| YPO1848  | yecC                | putative amino-acid ABC transporter (ATP-binding protein)                                | 4.A.1   | 2.640   | 0.548  |
| YPO1906  | fyuA, psn           | pesticin/yersiniabactin receptor protein                                                 | 3.C.3   | 2.318   | 0.345  |
| YPO1907  | ybtE, irp5          | yersiniabactin siderophore biosynthetic protein                                          | 1.G.14  | 2.777   | 0.439  |
| YPO1908  | ybtT, irp4          | yersiniabactin biosynthetic protein YbtT                                                 | 1.G.14  | 2.697   | 0.339  |
| YPO1910  | irp1                | yersiniabactin biosynthetic protein                                                      | 1.G.14  | 2.647   | 0.273  |
| YPO1911  | irp2                | yersiniabactin biosynthetic protein                                                      | 1.G.14  | 2.125   | 0.095  |
| YPO1913  | ybtP, irp6          | lipoprotein inner membrane ABC-transporter                                               | 4.A     | 3.340   | 0.511  |
| YPO1914  | ybtQ, irp7          | inner membrane ABC-transporter YbtQ                                                      | 4.A     | 4.232   | 0.183  |
| YPO1915  | ybtX, irp8          | putative signal transducer                                                               | 2       | 3.114   | 0.462  |
| YPO1916  | ybtS, irp9          | putative salicylate synthetase                                                           | 1.G.14  | 3.929   | 0.368  |
| YPO1941  | ----                | putative membrane protein                                                                | 3.C.1   | 2.218   | 0.079  |
| YPO1943  | ----                | putative membrane protein                                                                | 3.C.1   | 2.200   | 0.017  |
| YPO1949  | tehB                | putative tellurite resistance protein                                                    | 5.D     | 2.235   | 0.076  |
| YPO1951  | hmsH                | haemin storage system, HmsH protein                                                      | 1.G.14  | 4.374   | 0.124  |
| YPO1952  | hmsF                | haemin storage system, HmsF protein                                                      | 1.G.14  | 4.021   | 0.389  |
| YPO1953  | hmsR                | haemin storage system, HmsR protein                                                      | 1.G.14  | 3.789   | 0.077  |
| YPO1954  | hmsS                | haemin storage system, HmsS protein                                                      | 1.G.14  | 3.615   | 0.066  |
| YPO1996  | ----                | hypothetical protein                                                                     | 5.I     | -2.328  | 0.153  |
| YPO2012  | ----                | putative membrane protein                                                                | 3.C.1   | -4.199  | 0.074  |
| YPO2040  | ----                | putative membrane protein                                                                | 3.C.1   | 2.734   | 0.333  |
| YPO2061  | znuA                | exported high-affinity zinc uptake system protein                                        | 4.A.2   | 2.118   | 0.008  |
| YPO2074  | fadD                | long-chain-fatty-acid-CoA ligase                                                         | 1.A     | -4.452  | 0.015  |
| YPO2080  | ----                | conserved hypothetical protein                                                           | 5.I     | -2.097  | 0.059  |

|         |                  |                                                                               |         |         |        |
|---------|------------------|-------------------------------------------------------------------------------|---------|---------|--------|
| YPO2144 | fadR, oleR, thdB | fatty acid metabolism regulatory protein                                      | 2       | 2.182   | 0.049  |
| YPO2147 | dadA, dadR       | D-amino acid dehydrogenase small subunit                                      | 1.A.2   | -7.488  | 0.644  |
| YPO2157 | gapA             | glyceraldehyde 3-phosphate dehydrogenase A                                    | 1.B.1   | 2.560   | 0.100  |
| YPO2174 | ----             | putative nucleotide sugar dehydrogenase                                       | 1.C.3   | -2.635  | 0.145  |
| YPO2182 | oppA             | periplasmic oligopeptide-binding protein precursor                            | 4.A     | -3.220  | 0.825  |
| YPO2185 | oppD             | oligopeptide transport ATP-binding protein                                    | 4.A     | -2.251  | 0.157  |
| YPO2191 | ----             | hypothetical protein                                                          | 5.I     | -7.178  | 0.089  |
| YPO2205 | trpC             | tryptophan biosynthesis protein TrpCF                                         | 1.D.4   | 3.132   | 1.070  |
| YPO2206 | trpD             | anthranilate phosphoribosyltransferase                                        | 1.D.4   | 2.251   | 0.037  |
| YPO2222 | ribA             | GTP cyclohydrolase II                                                         | 1.G.9   | 3.308   | 0.038  |
| YPO2229 | osmB             | osmotically inducible lipoprotein B precursor                                 | 5.F     | -2.641  | 0.035  |
| YPO2233 | ----             | conserved hypothetical protein                                                | 5.I     | -4.325  | 0.351  |
| YPO2234 | cstA             | putative carbon starvation protein A                                          | 5.F     | -3.919  | 0.179  |
| YPO2237 | ----             | putative integral membrane protein                                            | 4.A     | -2.422  | 0.046  |
| YPO2262 | ----             | putative exported protein                                                     | 3.C.1   | 2.107   | 0.025  |
| YPO2288 | amn              | putative AMP nucleosidase                                                     | 1.F.4   | -9.332  | 9.778  |
| YPO2290 | ----             | putative virulence factor                                                     | 5.I     | -5.483  | 4.519  |
| YPO2315 | ----             | putative exported protein                                                     | 3.C.1   | -2.066  | 0.024  |
| YPO2347 | ----             | putative membrane protein                                                     | 3.C.1   | 2.450   | 0.058  |
| YPO2348 | ----             | conserved hypothetical protein                                                | 5.I     | 2.172   | 0.034  |
| YPO2358 | sapD             | peptide transport system ATP-binding protein                                  | 4.A.6   | 3.078   | 0.023  |
| YPO2359 | sapF             | peptide transport system ATP-binding protein                                  | 4.A.6   | 2.279   | 0.178  |
| YPO2360 | ----             | conserved hypothetical protein                                                | 5.I     | 2.313   | 0.105  |
| YPO2374 | slyA             | MarR-family transcriptional regulatory protein                                | 2       | -2.505  | 0.013  |
| YPO2386 | sodB             | superoxide dismutase [Fe]                                                     | 4.G     | -2.604  | 0.099  |
| YPO2390 | cfa, cdfA        | cyclopropane-fatty-acyl-phospholipid synthase                                 | 1.H     | -2.303  | 0.162  |
| YPO2410 | ----             | Conserved hypothetical protein                                                | 5.I     | -2.508  | 0.127  |
| YPO2436 | ----             | hypothetical protein                                                          | 5.I     | -2.388  | 0.120  |
| YPO2439 | yfeA             | periplasmic-binding protein                                                   | 4.A.2   | 2.796   | 0.067  |
| YPO2443 | ----             | putative membrane protein                                                     | 3.C.1   | 8.657   | 2.161  |
| YPO2449 | ----             | putative LuxR-family regulatory protein                                       | 2       | 2.255   | 0.073  |
| YPO2460 | ----             | conserved hypothetical protein                                                | 5.I     | 2.373   | 0.144  |
| YPO2497 | ----             | putative LysR-family transcriptional regulatory protein                       | 2       | -2.212  | 0.127  |
| YPO2501 | rbsB             | sugar binding protein precursor                                               | 4.A.3   | -3.325  | 1.167  |
| YPO2511 | ----             | putative exported protein                                                     | 3.C.1   | -5.952  | 0.320  |
| YPO2539 | idnO             | gluconate 5-dehydrogenase                                                     | 1.A.1   | -2.801  | 1.033  |
| YPO2577 | ----             | putative aldehyde dehydrogenase                                               | 5.I     | -4.397  | 0.063  |
| YPO2590 | ----             | hypothetical protein                                                          | 5.I     | -7.488  | 0.734  |
| YPO2592 | ----             | putative membrane protein                                                     | 3.C.1   | 2.256   | 0.145  |
| YPO2599 | lipB             | lipoate-protein ligase B                                                      | 1.G.3   | 4.379   | 0.061  |
| YPO2608 | holA             | DNA polymerase III, delta subunit                                             | 3.A.7   | 3.581   | 0.735  |
| YPO2615 | glnH             | putative amino acid-binding protein precursor                                 | 4.A.1   | -4.569  | 0.037  |
| YPO2616 | cutE, Int        | putative apolipoprotein N-acyltransferase                                     | 3.C.1   | 2.770   | 0.165  |
| YPO2617 | ybeX             | putative membrane protein                                                     | 3.C.1   | 2.578   | 0.283  |
| YPO2640 | trp1400A         | IS1400 transposase A                                                          | 5.A     | 3.051   | 0.030  |
| YPO2659 | cspB             | cold shock protein                                                            | 5.F     | 3.592   | 0.265  |
| YPO2674 | ----             | putative exported protein                                                     | 3.C.1   | -15.310 | 1.550  |
| YPO2675 | ----             | putative potassium channel protein                                            | 4.A.2   | -2.357  | 0.085  |
| YPO2732 | lemA, 3          | putative exported protein                                                     | 3.C.1   | 3.730   | 0.355  |
| YPO2734 | ccmA             | putative heme exporter protein A                                              | 4.A.6   | 2.649   | 0.284  |
| YPO2736 | ccmC             | putative heme exporter protein C                                              | 4.A.6   | 2.531   | 0.105  |
| YPO2737 | ccmD             | putative heme exporter protein D                                              | 4.A.6   | 2.627   | 0.184  |
| YPO2744 | fadL, ttr        | putative long-chain fatty acid transport protein                              | 4.A.3   | -4.689  | 0.215  |
| YPO2746 | ----             | putative 3-ketoacyl-CoA thiolase                                              | 1.A     | -2.296  | 0.404  |
| YPO2757 | fabB, fabC       | 3-oxoacyl-[acyl-carrier-protein] synthase I                                   | 1.H     | -3.879  | 0.351  |
| YPO2760 | flk              | putative flagellar assembly regulatory protein, Flk                           | 4.D     | 2.492   | 0.285  |
| YPO2765 | asd, usg-1       | putative aspartate-semialdehyde dehydrogenase                                 | 1.C     | -2.151  | 0.139  |
| YPO2772 | purF             | amidophosphoribosyltransferase                                                | 1.F.1   | 2.299   | 0.346  |
| YPO2774 | hisJ             | histidine-binding periplasmic protein                                         | 4.A.1   | -3.699  | 0.281  |
| YPO2782 | ----             | putative membrane protein                                                     | 3.C.1   | 51.849  | 9.398  |
| YPO2795 | ----             | hypothetical protein                                                          | 5.I     | -2.116  | 0.097  |
| YPO2835 | pstC             | putative phosphate transport system permease                                  | 4.A     | 5.363   | 0.348  |
| YPO2846 | ----             | putative ABC-transporter ATP-binding protein                                  | 4.A     | -2.199  | 0.095  |
| YPO2857 | ----             | putative exported protein                                                     | 3.C.1   | -2.377  | 0.149  |
| YPO2883 | ndk              | nucleoside diphosphate kinase                                                 | 1.F.4   | -3.889  | 0.018  |
| YPO2894 | ----             | conserved hypothetical protein                                                | 5.I     | -2.201  | 0.134  |
| YPO2895 | nifU             | NifU family protein                                                           | 5.I     | -2.400  | 0.075  |
| YPO2907 | glyA             | serine hydroxymethyltransferase                                               | 1.C     | 2.324   | 0.054  |
| YPO2908 | hmp, hmpA, hmpX  | flavohepotein                                                                 | 1.B.7.a | 2.531   | 0.454  |
| YPO2929 | acpS, dpj        | holo-[acyl-carrier protein] synthase                                          | 1.H     | -2.212  | 0.160  |
| YPO2930 | pdxJ             | pyridoxal phosphate biosynthetic protein PdxJ                                 | 1.G.6   | -2.366  | 0.053  |
| YPO2962 | ----             | conserved hypothetical protein                                                | 5.I     | -2.125  | 0.108  |
| YPO2974 | ----             | putative B-type cytochrome                                                    | 1.B.7.c | 3.441   | 0.500  |
| YPO2976 | ----             | conserved hypothetical protein                                                | 5.I     | 2.370   | 0.061  |
| YPO2983 | nupC, cru        | nucleoside permease                                                           | 4.A.6   | 4.623   | 0.331  |
| YPO2992 | cysK, cysZ       | cysteine synthase A                                                           | 1.D.3   | 3.031   | 0.030  |
| YPO2994 | ptsI             | PTS system, enzyme I component                                                | 4.A.3   | 2.494   | 0.345  |
| YPO3001 | ----             | putative pyridine nucleotide-disulphide oxidoreductase                        | 1.B.7.c | 111.258 | 34.064 |
| YPO3014 | cysT             | sulfate transport system permease protein CysT                                | 4.A.5   | 3.399   | 0.319  |
| YPO3015 | cysP             | thiosulfate-binding protein                                                   | 4.A.5   | 5.350   | 0.512  |
| YPO3040 | napF             | ferredoxin-type protein NapF                                                  | 1.B.7.c | 2.256   | 0.036  |
| YPO3041 | narP             | nitrate/nitrite response regulator protein NarP                               | 2       | -2.384  | 0.115  |
| YPO3048 | ----             | probable ABC-transporter, ATP-binding protein                                 | 4.A     | -4.203  | 0.423  |
| YPO3049 | ----             | putative binding protein-dependent transport system, inner-membrane component | 4.A     | -2.406  | 0.455  |
| YPO3050 | ----             | putative exported protein                                                     | 3.C.1   | -8.234  | 0.682  |
| YPO3070 | yfgD             | putative arsenate reductase                                                   | 5.D     | -2.237  | 0.058  |
| YPO3071 | ----             | conserved hypothetical protein                                                | 5.I     | 4.962   | 0.622  |
| YPO3120 | recR             | recombination protein RecR                                                    | 3.A.7   | 2.357   | 0.116  |
| YPO3128 | ----             | conserved hypothetical protein                                                | 5.I     | -2.732  | 0.298  |

|         |                  |                                                                            |         |         |        |
|---------|------------------|----------------------------------------------------------------------------|---------|---------|--------|
| YPO3134 | ykgM             | putative ribosomal protein                                                 | 3.A.2   | 16.593  | 3.542  |
| YPO3135 | ----             | putative ribosomal protein L36                                             | 3.A.2   | 23.457  | 0.008  |
| YPO3139 | ----             | putative 6-O-methylguanine DNA methyltransferase family protein            | 5.I     | 2.346   | 0.189  |
| YPO3151 | ----             | conserved hypothetical protein                                             | 5.I     | -2.108  | 0.033  |
| YPO3172 | thiJ             | 4-methyl-5(B-hydroxyethyl)-thiazol monophosphate biosynthesis enzyme       | 1.G.8   | 2.855   | 0.164  |
| YPO3243 | lpcA, gmhA, tfrA | phosphoheptose isomerase                                                   | 3.C.2   | -2.141  | 0.005  |
| YPO3267 | emrA             | multidrug resistance protein A                                             | 5.D     | 6.323   | 0.519  |
| YPO3319 | katY             | catalase-peroxidase                                                        | 4.G     | -3.244  | 0.667  |
| YPO3320 | cybC             | putative cytochrome B562                                                   | 1.B.7.c | -4.440  | 0.955  |
| YPO3321 | cybB             | probable cytochrome B561                                                   | 1.B.7.c | -3.068  | 0.532  |
| YPO3326 | araD             | L-ribulose-5-phosphate 4-epimerase                                         | 1.A.1   | -4.506  | 0.155  |
| YPO3336 | ----             | conserved hypothetical protein                                             | 5.I     | 2.780   | 0.344  |
| YPO3337 | map              | methionine aminopeptidase                                                  | 3.A.8   | 3.223   | 0.036  |
| YPO3340 | ----             | putative exogenous ferric siderophore receptor (pseudogene)                | 1.G.14  | 3.628   | 0.208  |
| YPO3372 | cysJ             | sulfite reductase [NADPH] flavoprotein alpha-component                     | 1.C.5   | 4.726   | 0.438  |
| YPO3382 | gsrA, degP, htrA | global stress requirement protein GsrA                                     | 3.B.3   | -2.208  | 0.010  |
| YPO3410 | yacC             | putative exported protein                                                  | 3.C.1   | 2.174   | 0.184  |
| YPO3420 | pdhR, aceC, genA | pyruvate dehydrogenase complex repressor                                   | 2       | 2.128   | 0.071  |
| YPO3484 | ----             | conserved hypothetical protein                                             | 5.I     | 4.103   | 0.425  |
| YPO3488 | deaD, csdA, mssB | cold-shock dead-box protein A                                              | 5.I     | 2.453   | 0.363  |
| YPO3498 | ----             | conserved hypothetical protein                                             | 5.I     | 2.651   | 0.031  |
| YPO3527 | ----             | conserved hypothetical protein                                             | 5.I     | -11.555 | 0.601  |
| YPO3557 | gltB, aspB       | glutamate synthase [NADPH] large chain precursor                           | 1.D.1   | 3.090   | 0.446  |
| YPO3558 | gltD, aspB       | glutamate synthase [NADPH] small chain                                     | 1.D.1   | 2.253   | 0.303  |
| YPO3582 | rpoN, glnF, ntrA | RNA polymerase sigma-54 factor                                             | 3.A.9   | -3.225  | 0.448  |
| YPO3583 | yhbH             | probable sigma (54) modulation protein (pseudogene)                        | 3.A.9   | -3.521  | 0.132  |
| YPO3607 | ----             | conserved hypothetical protein                                             | 5.I     | 50.613  | 14.128 |
| YPO3632 | ddg              | putative membrane protein                                                  | 3.C.1   | 2.239   | 0.319  |
| YPO3633 | ----             | putative periplasmic binding protein                                       | 4.A     | -4.165  | 0.091  |
| YPO3643 | cspa2            | major cold shock protein Cspa2                                             | 5.F     | 4.249   | 0.350  |
| YPO3644 | cspa1            | major cold shock protein Cspa1                                             | 5.F     | 3.178   | 0.479  |
| YPO3647 | ----             | conserved hypothetical protein                                             | 5.I     | -6.347  | 0.095  |
| YPO3648 | ----             | putative 2-hydroxy-3-oxopropionate reductase                               | 1.A.1   | -5.305  | 0.803  |
| YPO3649 | ----             | putative gamma carboxymuconolactone decarboxylase                          | 1.A     | -4.632  | 0.468  |
| YPO3650 | ----             | putative metabolite transport protein                                      | 4.A     | -2.684  | 0.326  |
| YPO3651 | ----             | putative GntR-family transcriptional regulatory protein                    | 2       | -2.150  | 0.202  |
| YPO3661 | ----             | putative membrane protein                                                  | 3.C.1   | -2.221  | 0.303  |
| YPO3662 | ----             | conserved hypothetical protein                                             | 5.I     | -2.458  | 0.018  |
| YPO3681 | ----             | putative insecticidal toxin                                                | 4.I     | -4.214  | 1.022  |
| YPO3682 | ----             | putative lysR-family transcriptional regulatory protein                    | 2       | -7.476  | 5.561  |
| YPO3698 | treR             | trehalose operon repressor                                                 | 2       | 2.163   | 0.156  |
| YPO3708 | ----             | conserved hypothetical protein                                             | 5.I     | -2.443  | 0.069  |
| YPO3711 | lamB, malB       | maltoporin                                                                 | 4.A.3   | 18.748  | 7.654  |
| YPO3727 | metA             | homoserine O-succinyltransferase                                           | 1.D.2   | 21.185  | 7.243  |
| YPO3754 | tufA, tufB       | elongation factor Tu                                                       | 3.A.8   | -2.237  | 0.047  |
| YPO3766 | fadB, oldB       | fatty acid oxidation complex alpha subunit                                 | 1.A     | -2.831  | 0.159  |
| YPO3767 | fadA, oldA       | 3-ketoacyl-CoA thiolase                                                    | 1.A     | -2.369  | 0.091  |
| YPO3788 | metE             | 5-methyltetrahydropteroyltriL-glutamate--homocyst eine methyltransferase   | 1.D.2   | 8.826   | 0.623  |
| YPO3789 | metR             | lysR-family transcriptional regulatory protein                             | 2       | 8.892   | 0.972  |
| YPO3798 | ----             | putative exported protein                                                  | 3.C.1   | 18.331  | 2.463  |
| YPO3803 | ----             | hypothetical protein                                                       | 5.I     | 8.070   | 2.229  |
| YPO3804 | livF             | high-affinity branched-chain amino acid transport, ATP-binding protein     | 4.A.1   | 3.968   | 0.500  |
| YPO3805 | livG             | high-affinity branched-chain amino acid transport, ATP-binding protein     | 4.A.1   | 4.617   | 0.245  |
| YPO3806 | livM             | high-affinity branched-chain amino acid transport system, permease protein | 4.A.1   | 3.419   | 0.085  |
| YPO3807 | livH             | high-affinity branched-chain amino acid transport system, permease protein | 4.A.1   | 4.292   | 0.227  |
| YPO3808 | livK, livJ       | branched-chain amino acid-binding protein                                  | 4.A.1   | 3.849   | 0.236  |
| YPO3820 | ----             | putative P-type cation-translocating membrane ATPase                       | 4.A.2   | -5.437  | 1.102  |
| YPO3867 | rho, nitA, psuA  | transcription termination factor                                           | 3.A.9   | 3.076   | 0.128  |
| YPO3881 | ----             | putative chaperone protein                                                 | 4.B     | 2.609   | 0.097  |
| YPO3886 | ----             | colicin (partial)                                                          | 5.B     | 4.176   | 1.152  |
| YPO3887 | ----             | hypothetical protein                                                       | 5.I     | 9.823   | 1.219  |
| YPO3888 | ilvC             | ketol-acid reductoisomerase                                                | 1.D.6   | 29.860  | 3.894  |
| YPO3896 | ilvA             | threonine dehydratase                                                      | 1.D.6   | 4.174   | 0.795  |
| YPO3897 | ilvD             | dihydroxy-acid dehydratase                                                 | 1.D.6   | 2.337   | 0.297  |
| YPO3899 | ilvE             | branched-chain amino acid aminotransferase                                 | 1.D.6   | 2.790   | 0.582  |
| YPO3900 | ilvM             | acetolactate synthase isozyme II small subunit                             | 1.D.6   | 4.556   | 0.520  |
| YPO3901 | ilvG             | acetolactate synthase isozyme II large subunit                             | 1.D.6   | 4.047   | 0.470  |
| YPO3910 | ----             | putative vitamin B12 receptor protein                                      | 3.C     | 3.099   | 0.307  |
| YPO3922 | ----             | hemophore HasA                                                             | 4.A.6   | -2.496  | 0.021  |
| YPO3927 | argC             | N-acetyl-gamma-glutamyl-phosphate reductase                                | 1.D.1   | -2.404  | 0.015  |
| YPO3963 | ----             | sugar transport system permease protein                                    | 4.A.3   | 47.131  | 3.026  |
| YPO3966 | ----             | conserved hypothetical protein                                             | 5.I     | 2.978   | 0.234  |
| YPO3970 | uspA             | universal stress protein A                                                 | 5.F     | -2.506  | 0.056  |
| YPO3986 | cdh              | CDP-diacylglycerol pyrophosphatase                                         | 1.H     | -3.719  | 0.541  |
| YPO3992 | dctA             | C4-dicarboxylate transport protein                                         | 4.A.3   | 2.435   | 0.049  |
| YPO4003 | dppA             | periplasmic dipeptide transport protein                                    | 4.A.6   | 3.340   | 0.258  |
| YPO4037 | ----             | sugar-binding periplasmic protein                                          | 4.A.3   | -13.584 | 2.105  |
| YPO4048 | mdfA, cmr        | multidrug translocase                                                      | 5.D     | 2.386   | 0.085  |
| YPO4056 | fdol             | formate dehydrogenase, cytochrome b556 protein                             | 1.B.7.b | -2.080  | 0.071  |
| YPO4064 | ----             | hypothetical protein                                                       | 5.I     | -3.580  | 0.070  |
| YPO4101 | rnpA             | ribonuclease P protein                                                     | 3.B.1   | 6.251   | 0.925  |
| YPO4102 | ydC              | probable membrane protein                                                  | 3.C.1   | 2.250   | 0.329  |
| YPO4109 | ----             | putative amino acid transport system permease                              | 4.A.1   | 2.934   | 0.183  |
| YPO4111 | ----             | putative periplasmic solute-binding protein                                | 4.A     | 3.218   | 0.152  |
| YPO4125 | atpF, uncF, papF | ATP synthase subunit B protein                                             | 1.B.9   | -2.284  | 0.184  |
| YPO4126 | atpE, uncE, papH | ATP synthase subunit C protein                                             | 1.B.9   | -2.435  | 0.068  |
| YPO4127 | atpB, uncB, papD | ATP synthase subunit B protein                                             | 1.B.9   | -2.114  | 0.128  |

| Systematic | Common | Function                     | Code | Fold change | SD    |
|------------|--------|------------------------------|------|-------------|-------|
| yscA       |        | type III secretion component |      | 2.651       | 0.191 |
| yscB       |        | type III secretion component |      | 2.699       | 0.021 |
| yscC       |        | type III secretion component |      | 3.037       | 0.024 |
| yscD       |        | type III secretion component |      | 3.052       | 0.891 |
| yscE       |        | type III secretion component |      | 4.141       | 0.125 |
| yscF       |        | type III secretion component |      | 4.074       | 0.095 |
| yscH       |        | type III secretion component |      | 2.346       | 0.166 |
| yscI       |        | type III secretion component |      | 2.421       | 0.116 |
| yscJ       |        | type III secretion component |      | 2.988       | 0.075 |
| yscK       |        | type III secretion component |      | 7.836       | 1.089 |
| yscN       |        | type III secretion component |      | 2.141       | 0.013 |
| yscO       |        | type III secretion component |      | 2.912       | 0.197 |
| yscQ       |        | type III secretion component |      | 2.458       | 0.128 |
| yscR       |        | type III secretion component |      | 2.262       | 0.073 |
| yscS       |        | type III secretion component |      | 2.269       | 0.088 |
| yscT       |        | type III secretion component |      | 2.554       | 0.138 |
| yscU       |        | type III secretion component |      | 3.565       | 0.349 |
| yscX       |        | type III secretion component |      | 3.067       | 0.283 |
| yscY       |        | type III secretion component |      | 5.612       | 0.639 |
| lcrD       |        | type III secretion component |      | 4.039       | 0.187 |
| lcrF       |        | type III secretion component |      | -2.903      | 0.139 |
| lcrG       |        | type III secretion component |      | 4.408       | 0.070 |
| lcrH       |        | type III secretion component |      | 3.457       | 0.074 |
| lcrR       |        | type III secretion component |      | 5.660       | 0.452 |
| lcrV       |        | type III secretion component |      | 4.761       | 0.188 |
| sycN       |        | type III secretion component |      | 2.056       | 0.306 |
| sycT       |        | type III secretion component |      | -2.442      | 0.614 |
| tyeA       |        | type III secretion component |      | 2.092       | 0.047 |
| virG       |        | type III secretion component |      | -2.205      | 0.021 |
| yopB       |        | type III secretion component |      | 4.295       | 0.380 |
| yopD       |        | type III secretion component |      | 2.754       | 0.122 |
| yopE       |        | type III secretion component |      | 3.507       | 0.103 |
| yopH       |        | type III secretion component |      | 2.390       | 0.108 |
| yopK       |        | type III secretion component |      | 5.856       | 0.345 |
| yopP       |        | type III secretion component |      | 2.890       | 0.614 |
| yopT       |        | type III secretion component |      | -3.418      | 0.129 |
| ypkA       |        | type III secretion component |      | 3.776       | 0.382 |
| YPCD1.03c  |        |                              |      | 3.901       | 1.213 |
| YPCD1.15c  |        |                              |      | 3.347       | 0.197 |
| YPCD1.16c  |        |                              |      | 3.891       | 0.535 |
| YPCD1.18c  |        |                              |      | 3.417       | 0.296 |
| YPCD1.70c  |        |                              |      | 5.078       | 1.181 |
| YPCD1.73c  |        |                              |      | 4.196       | 0.153 |
| YPCD1.75c  |        |                              |      | 3.149       | 0.012 |
| YPCD1.81   |        |                              |      | 2.369       | 0.320 |
| YPCD1.82c  |        |                              |      | 3.275       | 0.238 |
| YPCD1.83c  |        |                              |      | 3.459       | 0.410 |
| YPCD1.85   |        |                              |      | 4.027       | 0.582 |

#### pMT1

| Systematic | Common | Function | Code | Fold change | SD    |
|------------|--------|----------|------|-------------|-------|
| YPMT1.34   |        |          |      | -4.635      | 0.605 |
| YPMT1.42   |        |          |      | -2.539      | 0.121 |
| YPMT1.86A  |        |          |      | -2.105      | 0.133 |
| YPMT1.86c  |        |          |      | -2.237      | 0.072 |

#### pPCP1

| Systematic | Common | Function                               | Code | Fold change | SD    |
|------------|--------|----------------------------------------|------|-------------|-------|
| pim        |        | pesticin immunity protein              |      | -4.348      | 0.306 |
| pla        |        | fibrinolysin/coagulase precursor       |      | -6.135      | 0.614 |
| rop        |        | plasmid replication regulatory protein |      | -2.051      | 0.047 |
| YPPCP1.06  |        |                                        |      | -3.240      | 0.189 |

\*Gene list is sorted by YPO number (chromosome) and the three plasmids.

†Functional classification based on CO92 chromosomal annotation ([www.sanger.ac.uk/Projects/Y\\_pestis/Yp\\_gene\\_list\\_hierarchical.shtml](http://www.sanger.ac.uk/Projects/Y_pestis/Yp_gene_list_hierarchical.shtml)).

‡Positive numbers indicate the mean fold change of the replicates up-regulated in the mouse lung compared to BHI broth at 37°C, and negative numbers indicate the mean fold change down-regulated.

§Standard deviation of the mean fold change of the replicates.

¶ORFs highlighted in yellow are up-regulated in the mouse lung compared with BHI broth at 37°C, and ORFs in gray are down-regulated.
