# Supplementary material
Source: PubMed Central journal article supplement (PMC1308902)
Supplement: pnas_0506840102_6.pdf [file pnas_0506840102_6.pdf]

Table 3. *Y. pestis* differential gene expression during pneumonic plague, by category

| Chromosome* | Systematic                                                  | Common           | Function                                                       | Code†   |
|-------------|-------------------------------------------------------------|------------------|----------------------------------------------------------------|---------|
|             | <b>Small molecule metabolism</b>                            |                  |                                                                |         |
|             | <b>Degradation</b>                                          |                  |                                                                |         |
|             | YPO0589 <sup>‡</sup>                                        | fadH, fadH1      | 2,4-dienoyl-CoA reductase                                      | 1.A     |
|             | YPO2074                                                     | fadD             | long-chain-fatty-acid-CoA ligase                               | 1.A     |
|             | YPO2746                                                     | -----            | putative 3-ketoacyl-CoA thiolase                               | 1.A     |
|             | YPO3649                                                     | -----            | putative gamma carboxymuconolactone decarboxylase              | 1.A     |
|             | YPO3766                                                     | fadB, oldB       | fatty acid oxidation complex alpha subunit                     | 1.A     |
|             | YPO3767                                                     | fadA, oldA       | 3-ketoacyl-CoA thiolase                                        | 1.A     |
|             | <b>Degradation - carbon compounds</b>                       |                  |                                                                |         |
|             | YPO0008                                                     | rbsK             | ribokinase                                                     | 1.A.1   |
|             | YPO0253                                                     | acs              | acetyl-coenzyme A synthetase                                   | 1.A.1   |
|             | YPO0579                                                     | uxaC             | uronate isomerase                                              | 1.A.1   |
|             | YPO1290                                                     | -----            | putative aldehyde dehydrogenase                                | 1.A.1   |
|             | YPO2539                                                     | idnO             | gluconate 5-dehydrogenase                                      | 1.A.1   |
|             | YPO3326                                                     | araD             | L-ribulose-5-phosphate 4-epimerase                             | 1.A.1   |
|             | YPO3648                                                     | -----            | putative 2-hydroxy-3-oxopropionate reductase                   | 1.A.1   |
|             | <b>Degradation - amino acids</b>                            |                  |                                                                |         |
|             | YPO1201                                                     | -----            | putative amino acid decarboxylase                              | 1.A.2   |
|             | YPO1386                                                     | ansB             | putative L-asparaginase II precursor                           | 1.A.2   |
|             | YPO1771                                                     | sdaA             | L-serine dehydratase                                           | 1.A.2   |
|             | YPO2147                                                     | dadA, dadR       | D-amino acid dehydrogenase small subunit                       | 1.A.2   |
|             | <b>Energy metabolism - glycolysis</b>                       |                  |                                                                |         |
|             | YPO2157                                                     | gapA             | glyceraldehyde 3-phosphate dehydrogenase A                     | 1.B.1   |
|             | <b>Energy metabolism - TCA</b>                              |                  |                                                                |         |
|             | YPO1108                                                     | gltA, gluT, icdB | citrate synthase GltA                                          | 1.B.3   |
|             | YPO1109                                                     | sdhC, cybA       | succinate dehydrogenase cytochrome b-556 subunit               | 1.B.3   |
|             | YPO1110                                                     | sdhD             | succinate dehydrogenase hydrophobic membrane anchor protein    | 1.B.3   |
|             | YPO1112                                                     | sdhB             | succinate dehydrogenase iron-sulfur protein                    | 1.B.3   |
|             | YPO1113                                                     | sucA             | 2-oxoglutarate dehydrogenase E1 component                      | 1.B.3   |
|             | YPO1116                                                     | sucD             | succinyl-CoA synthetase alpha chain                            | 1.B.3   |
|             | <b>Energy metabolism - aerobic respiration</b>              |                  |                                                                |         |
|             | YPO2908                                                     | hmp, hmpA, hmpX  | flavo-hemoprotein                                              | 1.B.7.a |
|             | <b>Energy metabolism - anaerobic respiration</b>            |                  |                                                                |         |
|             | YPO0160                                                     | nirD             | nitrite reductase [NAD]                                        | 1.B.7.b |
|             | YPO0343                                                     | hydN             | 4Fe-4S ferredoxin                                              | 1.B.7.b |
|             | YPO0357                                                     | frdD, b4151      | fumarate reductase hydrophobic protein                         | 1.B.7.b |
|             | YPO0358                                                     | frdC, b4152      | fumarate reductase hydrophobic protein                         | 1.B.7.b |
|             | YPO0359                                                     | frdB, b4153      | fumarate reductase iron-sulfur protein                         | 1.B.7.b |
|             | YPO4056                                                     | fdol             | formate dehydrogenase, cytochrome b556 protein                 | 1.B.7.b |
|             | <b>Energy metabolism - electron transport</b>               |                  |                                                                |         |
|             | YPO1617                                                     | ndh              | NADH dehydrogenase                                             | 1.B.7.c |
|             | YPO2974                                                     | -----            | putative B-type cytochrome                                     | 1.B.7.c |
|             | YPO3001                                                     | -----            | putative pyridine nucleotide-disulphide oxidoreductase         | 1.B.7.c |
|             | YPO3040                                                     | napF             | ferredoxin-type protein NapF                                   | 1.B.7.c |
|             | YPO3320                                                     | cybC             | putative cytochrome B562                                       | 1.B.7.c |
|             | YPO3321                                                     | cybB             | probable cytochrome B561                                       | 1.B.7.c |
|             | <b>Energy metabolism - ATP-proton motive force</b>          |                  |                                                                |         |
|             | YPO4125                                                     | atpF, uncF, papF | ATP synthase subunit B protein                                 | 1.B.9   |
|             | YPO4126                                                     | atpE, uncE, papH | ATP synthase subunit C protein                                 | 1.B.9   |
|             | YPO4127                                                     | atpB, uncB, papD | ATP synthase subunit B protein                                 | 1.B.9   |
|             | <b>Central intermediary metabolism</b>                      |                  |                                                                |         |
|             | YPO0931                                                     | metK             | S-adenosylmethionine synthetase                                | 1.C     |
|             | YPO2765                                                     | asd, usg-1       | putative aspartate-semialdehyde dehydrogenase                  | 1.C     |
|             | YPO2907                                                     | glyA             | serine hydroxymethyltransferase                                | 1.C     |
|             | <b>Central intermediary metabolism - sugar nucleotides</b>  |                  |                                                                |         |
|             | YPO2174                                                     | -----            | putative nucleotide sugar dehydrogenase                        | 1.C.3   |
|             | <b>Central intermediary metabolism - sulphur metabolism</b> |                  |                                                                |         |
|             | YPO3372                                                     | cysJ             | sulfite reductase [NADPH] flavoprotein alpha-component         | 1.C.5   |
|             | <b>Amino acid biosynthesis - glutamate family</b>           |                  |                                                                |         |
|             | YPO0024                                                     | glnA             | glutamine synthetase                                           | 1.D.1   |
|             | YPO3557                                                     | gltB, aspB       | glutamate synthase [NADPH] large chain precursor               | 1.D.1   |
|             | YPO3558                                                     | gltD, aspB       | glutamate synthase [NADPH] small chain                         | 1.D.1   |
|             | YPO3927                                                     | argC             | N-acetyl-gamma-glutamyl-phosphate reductase                    | 1.D.1   |
|             | <b>Amino acid biosynthesis - aspartate family</b>           |                  |                                                                |         |
|             | YPO0115                                                     | metB             | cystathionine gamma-synthase (pseudogene)                      | 1.D.2   |
|             | YPO0116                                                     | metL, metM       | bifunctional aspartokinase/homoserine dehydrogenase II         | 1.D.2   |
|             | YPO0117                                                     | metF             | 5,10-methylenetetrahydrofolate reductase                       | 1.D.2   |
|             | YPO0278                                                     | metC             | cystathionine beta-lyase                                       | 1.D.2   |
|             | YPO0348                                                     | aspA             | aspartate ammonia-lyase                                        | 1.D.2   |
|             | YPO1041                                                     | dapD             | 2,3,4,5-tetrahydropyridine-2-carboxylate N-succinyltransferase | 1.D.2   |

|                                                                  |                  |                                                                                          |        |
|------------------------------------------------------------------|------------------|------------------------------------------------------------------------------------------|--------|
| YPO3727                                                          | metA             | homoserine O-succinyltransferase                                                         | 1.D.2  |
| YPO3788                                                          | metE             | 5-methyltetrahydropteroyltryglutamate--homocyst eine methyltransferase                   | 1.D.2  |
| <b>Amino acid biosynthesis - serine family</b>                   |                  |                                                                                          |        |
| YPO0914                                                          | serA             | D-3-phosphoglycerate dehydrogenase                                                       | 1.D.3  |
| YPO2992                                                          | cysK, cysZ       | cysteine synthase A                                                                      | 1.D.3  |
| <b>Amino acid biosynthesis - aromatic amino acid family</b>      |                  |                                                                                          |        |
| YPO2205                                                          | trpC             | tryptophan biosynthesis protein TrpCF                                                    | 1.D.4  |
| YPO2206                                                          | trpD             | anthranilate phosphoribosyltransferase                                                   | 1.D.4  |
| <b>Amino acid biosynthesis - histidine</b>                       |                  |                                                                                          |        |
| YPO1542                                                          | hisI, hisIE      | histidine biosynthesis bifunctional protein [includes: phosphoribosyl-amp cyclohydrolase | 1.D.5  |
| YPO1543                                                          | hisF             | histidine biosynthesis protein (cyclase)                                                 | 1.D.5  |
| YPO1544                                                          | hisA             | phosphoribosylformimino-5-aminoimidazole carboxamide ribotide isomerase                  | 1.D.5  |
| YPO1546                                                          | hisB             | histidinol-phosphatase and imidazoleglycerol-phosphate dehydratase                       | 1.D.5  |
| YPO1547                                                          | hisC             | histidinol-phosphate aminotransferase                                                    | 1.D.5  |
| YPO1549                                                          | hisG             | ATP phosphoribosyltransferase                                                            | 1.D.5  |
| <b>Amino acid biosynthesis - pyruvate family</b>                 |                  |                                                                                          |        |
| YPO0531                                                          | leuC             | 3-isopropylmalate dehydratase large subunit                                              | 1.D.6  |
| YPO0539                                                          | ilvI             | acetolactate synthase isozyme III large subunit                                          | 1.D.6  |
| YPO0540                                                          | ilvH             | acetolactate synthase isozyme III small subunit                                          | 1.D.6  |
| YPO3888                                                          | ilvC             | ketol-acid reductoisomerase                                                              | 1.D.6  |
| YPO3896                                                          | ilvA             | threonine dehydratase                                                                    | 1.D.6  |
| YPO3897                                                          | ilvD             | dihydroxy-acid dehydratase                                                               | 1.D.6  |
| YPO3899                                                          | ilvE             | branched-chain amino acid aminotransferase                                               | 1.D.6  |
| YPO3900                                                          | ilvM             | acetolactate synthase isozyme II small subunit                                           | 1.D.6  |
| YPO3901                                                          | ilvG             | acetolactate synthase isozyme II large subunit                                           | 1.D.6  |
| <b>Polyamine biosynthesis</b>                                    |                  |                                                                                          |        |
| YPO0929                                                          | speA             | biosynthetic arginine decarboxylase                                                      | 1.E    |
| <b>Purines, pyrimidines, nucleosides and nucleotides</b>         |                  |                                                                                          |        |
| YPO0378                                                          | purA, adeK       | adenylosuccinate synthetase                                                              | 1.F.1  |
| YPO2772                                                          | purF             | amidophosphoribosyltransferase                                                           | 1.F.1  |
| YPO1512                                                          | cdd              | cytidine deaminase                                                                       | 1.F.4  |
| YPO2288                                                          | amn              | putative AMP nucleosidase                                                                | 1.F.4  |
| YPO2883                                                          | ndk              | nucleoside diphosphate kinase                                                            | 1.F.4  |
| <b>Biosynthesis of cofactors, prosthetic groups and carriers</b> |                  |                                                                                          |        |
| YPO0286                                                          | ----             | putative coproporphyrinogen III oxidase                                                  | 1.G.12 |
| YPO1907                                                          | ybtE, irp5       | yersiniabactin siderophore biosynthetic protein                                          | 1.G.14 |
| YPO1908                                                          | ybtT, irp4       | yersiniabactin biosynthetic protein YbtT                                                 | 1.G.14 |
| YPO1910                                                          | irp1             | yersiniabactin biosynthetic protein                                                      | 1.G.14 |
| YPO1911                                                          | irp2             | yersiniabactin biosynthetic protein                                                      | 1.G.14 |
| YPO1916                                                          | ybtS, irp9       | putative salicylate synthetase                                                           | 1.G.14 |
| YPO1951                                                          | hmsH             | haemin storage system, HmsH protein                                                      | 1.G.14 |
| YPO1952                                                          | hmsF             | haemin storage system, HmsF protein                                                      | 1.G.14 |
| YPO1953                                                          | hmsR             | haemin storage system, HmsR protein                                                      | 1.G.14 |
| YPO1954                                                          | hmsS             | haemin storage system, HmsS protein                                                      | 1.G.14 |
| YPO3340                                                          | ----             | putative exogenous ferric siderophore receptor (pseudogene)                              | 1.G.14 |
| YPO2599                                                          | lipB             | lipoate-protein ligase B                                                                 | 1.G.3  |
| YPO0013                                                          | mobA, mob, chlB  | molybdopterin-guanine dinucleotide biosynthesis protein A                                | 1.G.4  |
| YPO2930                                                          | pdxJ             | pyridoxal phosphate biosynthetic protein PdxJ                                            | 1.G.6  |
| YPO1413                                                          | pncB             | putative nicotinate phosphoribosyltransferase                                            | 1.G.7  |
| YPO3172                                                          | thiJ             | 4-methyl-5-(B-hydroxyethyl)-thiazol monophosphate biosynthesis enzyme                    | 1.G.8  |
| YPO2222                                                          | ribA             | GTP cyclohydrolase II                                                                    | 1.G.9  |
| <b>Fatty acid biosynthesis</b>                                   |                  |                                                                                          |        |
| YPO1430                                                          | fabA             | 3-hydroxydecanoyl-[acyl-carrier-protein] dehydratase                                     | 1.H    |
| YPO2390                                                          | cfa, cdfA        | cyclopropane-fatty-acyl-phospholipid synthase                                            | 1.H    |
| YPO2757                                                          | fabB, fabC       | 3-oxoacyl-[acyl-carrier-protein] synthase I                                              | 1.H    |
| YPO2929                                                          | acpS, dpj        | holo-[acyl-carrier protein] synthase                                                     | 1.H    |
| YPO3986                                                          | cdh              | CDP-diacylglycerol pyrophosphatase                                                       | 1.H    |
| <b>Broad regulatory functions</b>                                |                  |                                                                                          |        |
| YPO0038                                                          | spoT             | guanosine-3',5'-bisbis(diphosphate) 3'-pyrophosphhydrolase                               | 2      |
| YPO0108                                                          | cytR             | transcriptional repressor                                                                | 2      |
| YPO0114                                                          | metJ             | transcriptional repressor protein                                                        | 2      |
| YPO0458                                                          | arcA, dye, fexA  | aerobic respiration control protein                                                      | 2      |
| YPO1301                                                          | psaE             | putative regulatory protein                                                              | 2      |
| YPO1308                                                          | ----             | putative LysR-family transcriptional regulatory protein                                  | 2      |
| YPO1576                                                          | ----             | putative GerR-family transcriptional regulatory protein                                  | 2      |
| YPO1728                                                          | ----             | putative transcriptional regulator of sugar transport (pseudogene)                       | 2      |
| YPO1915                                                          | ybtX, irp8       | putative signal transducer                                                               | 2      |
| YPO2144                                                          | fadR, oleR, thdB | fatty acid metabolism regulatory protein                                                 | 2      |
| YPO2374                                                          | slyA             | MarR-family transcriptional regulatory protein                                           | 2      |
| YPO2449                                                          | ----             | putative LuxR-family regulatory protein                                                  | 2      |
| YPO2497                                                          | ----             | putativeLlysR-family transcriptional regulatory protein                                  | 2      |
| YPO3041                                                          | narP             | nitrate/nitrite response regulator protein NarP                                          | 2      |
| YPO3420                                                          | pdhR, aceC, genA | pyruvate dehydrogenase complex repressor                                                 | 2      |

|                                                     |                  |                                                         |       |
|-----------------------------------------------------|------------------|---------------------------------------------------------|-------|
| YPO3651                                             | ----             | putative GntR-family transcriptional regulatory protein | 2     |
| YPO3682                                             | ----             | putative lysR-family transcriptional regulatory protein | 2     |
| YPO3698                                             | treR             | trehalose operon repressor                              | 2     |
| YPO3789                                             | metR             | lysR-family transcriptional regulatory protein          | 2     |
| <b>Macromolecule metabolism</b>                     |                  |                                                         |       |
| <b>Synthesis and modification of macromolecules</b> |                  |                                                         |       |
| YPO0231                                             | rpsM             | 30S ribosomal protein S13                               | 3.A.2 |
| YPO1392                                             | rpsA, ssyF       | 30S ribosomal protein S1                                | 3.A.2 |
| YPO3134                                             | ykgM             | putative ribosomal protein                              | 3.A.2 |
| YPO3135                                             | ----             | putative ribosomal protein L36                          | 3.A.2 |
| YPO1423a                                            | rnf              | putative ribosome modulation factor                     | 3.A.3 |
| YPO2608                                             | holA             | DNA polymerase III, delta subunit                       | 3.A.7 |
| YPO3120                                             | recR             | recombination protein RecR                              | 3.A.7 |
| YPO3337                                             | map              | methionine aminopeptidase                               | 3.A.8 |
| YPO3754                                             | tufA, tufB       | elongation factor Tu                                    | 3.A.8 |
| YPO3582                                             | rpoN, glnF, ntrA | RNA polymerase sigma-54 factor                          | 3.A.9 |
| YPO3583                                             | yhbH             | probable sigma (54) modulation protein (pseudogene)     | 3.A.9 |
| YPO3867                                             | rho, nitA, psuA  | transcription termination factor                        | 3.A.9 |
| <b>Degradation of macromolecules</b>                |                  |                                                         |       |
| YPO1058                                             | rnhB, b0183      | ribonuclease HII                                        | 3.B.1 |
| YPO4101                                             | mpa              | ribonuclease P protein                                  | 3.B.1 |
| YPO1683                                             | ----             | probable N-acetylmuramoyl-L-alanine amidase             | 3.B.3 |
| YPO3382                                             | gsrA, degP, htrA | global stress requirement protein GsrA                  | 3.B.3 |
| <b>Cell envelope</b>                                |                  |                                                         |       |
| YPO1011                                             | ----             | putative TonB-dependent outer membrane receptor         | 3.C   |
| YPO1411                                             | ----             | putative outer membrane porin C protein                 | 3.C   |
| YPO3910                                             | ----             | putative vitamin B12 receptor protein                   | 3.C   |
| YPO0042                                             | ----             | putative membrane protein                               | 3.C.1 |
| YPO0063                                             | ----             | putative membrane protein                               | 3.C.1 |
| YPO0132                                             | feoB             | ferrous iron transport protein B                        | 3.C.1 |
| YPO0163                                             | ----             | conserved integral membrane protein                     | 3.C.1 |
| YPO0251                                             | ----             | putative transmembrane transport protein                | 3.C.1 |
| YPO0252                                             | ----             | putative membrane protein                               | 3.C.1 |
| YPO0301                                             | ----             | putative exported protein                               | 3.C.1 |
| YPO0417                                             | ----             | putative O-antigen biosynthesis protein                 | 3.C.1 |
| YPO0424                                             | ----             | putative pectinesterase                                 | 3.C.1 |
| YPO0426                                             | ----             | putative membrane protein                               | 3.C.1 |
| YPO0448                                             | ----             | putative lipoprotein                                    | 3.C.1 |
| YPO0449                                             | ----             | putative exported protein                               | 3.C.1 |
| YPO0544                                             | ----             | putative membrane protein                               | 3.C.1 |
| YPO0570                                             | yqjD             | putative membrane protein                               | 3.C.1 |
| YPO0590                                             | hdeD             | putative membrane protein                               | 3.C.1 |
| YPO0862                                             | ----             | putative exported protein                               | 3.C.1 |
| YPO0988                                             | ----             | putative membrane protein                               | 3.C.1 |
| YPO1071                                             | ----             | putative lipoprotein                                    | 3.C.1 |
| YPO1221                                             | ----             | putative membrane protein                               | 3.C.1 |
| YPO1275                                             | spr              | putative lipoprotein                                    | 3.C.1 |
| YPO1302                                             | psaF             | putative membrane protein                               | 3.C.1 |
| YPO1698                                             | ----             | putative exported protein                               | 3.C.1 |
| YPO1699                                             | ----             | putative exported protein                               | 3.C.1 |
| YPO1700                                             | ----             | putative exported protein                               | 3.C.1 |
| YPO1718                                             | ----             | putative exported protein                               | 3.C.1 |
| YPO1941                                             | ----             | putative membrane protein                               | 3.C.1 |
| YPO1943                                             | ----             | putative membrane protein                               | 3.C.1 |
| YPO2012                                             | ----             | putative membrane protein                               | 3.C.1 |
| YPO2040                                             | ----             | putative membrane protein                               | 3.C.1 |
| YPO2262                                             | ----             | putative exported protein                               | 3.C.1 |
| YPO2315                                             | ----             | putative exported protein                               | 3.C.1 |
| YPO2347                                             | ----             | putative membrane protein                               | 3.C.1 |
| YPO2443                                             | ----             | putative membrane protein                               | 3.C.1 |
| YPO2511                                             | ----             | putative exported protein                               | 3.C.1 |
| YPO2592                                             | ----             | putative membrane protein                               | 3.C.1 |
| YPO2616                                             | cutE, Int        | putative apolipoprotein N-acyltransferase               | 3.C.1 |
| YPO2617                                             | ybeX             | putative membrane protein                               | 3.C.1 |
| YPO2674                                             | ----             | putative exported protein                               | 3.C.1 |
| YPO2732                                             | lemA, 3          | putative exported protein                               | 3.C.1 |
| YPO2782                                             | ----             | putative membrane protein                               | 3.C.1 |
| YPO2857                                             | ----             | putative exported protein                               | 3.C.1 |
| YPO3050                                             | ----             | putative exported protein                               | 3.C.1 |
| YPO3410                                             | yacC             | putative exported protein                               | 3.C.1 |
| YPO3632                                             | ddg              | putative membrane protein                               | 3.C.1 |
| YPO3661                                             | ----             | putative membrane protein                               | 3.C.1 |
| YPO3798                                             | ----             | putative exported protein                               | 3.C.1 |

|                                                                          |                   |                                                                               |       |
|--------------------------------------------------------------------------|-------------------|-------------------------------------------------------------------------------|-------|
| YPO4102                                                                  | yidC              | probable membrane protein                                                     | 3.C.1 |
| YPO1303                                                                  | psaA              | pH 6 antigen precursor (antigen 4) (adhesin)                                  | 3.C.2 |
| YPO3243                                                                  | lpcA, gmhA, tfrA  | phosphoheptose isomerase                                                      | 3.C.2 |
| YPO0781                                                                  | ----              | putative surface structure protein (pseudo)                                   | 3.C.3 |
| YPO1906                                                                  | fyuA, psn         | pesticin/yersiniabactin receptor protein                                      | 3.C.3 |
| <b>Cell processes</b>                                                    |                   |                                                                               |       |
| <b>Transport/binding proteins</b>                                        |                   |                                                                               |       |
| YPO0409                                                                  | ----              | putative periplasmic solute-binding protein                                   | 4.A   |
| YPO0411                                                                  | ----              | putative ABC transporter permease protein                                     | 4.A   |
| YPO0412                                                                  | ----              | putative ABC transporter ATP-binding protein                                  | 4.A   |
| YPO0465                                                                  | ----              | putative transport protein                                                    | 4.A   |
| YPO0584                                                                  | ----              | putative symporter protein                                                    | 4.A   |
| YPO1072                                                                  | ----              | ABC transporter permease protein                                              | 4.A   |
| YPO1073                                                                  | abc               | ABC transporter ATP-binding protein                                           | 4.A   |
| YPO1187                                                                  | ----              | putative substrate-binding periplasmic transport protein                      | 4.A   |
| YPO1343                                                                  | ----              | putative periplasmic binding protein                                          | 4.A   |
| YPO1344                                                                  | ----              | FecCD transport family protein                                                | 4.A   |
| YPO1345                                                                  | ----              | putative transport ATP-binding protein                                        | 4.A   |
| YPO1563                                                                  | ----              | putative transmembrane transporter                                            | 4.A   |
| YPO1913                                                                  | ybtP, irp6        | lipoprotein inner membrane ABC-transporter                                    | 4.A   |
| YPO1914                                                                  | ybtQ, irp7        | inner membrane ABC-transporter YbtQ                                           | 4.A   |
| YPO2182                                                                  | oppA              | periplasmic oligopeptide-binding protein precursor                            | 4.A   |
| YPO2185                                                                  | oppD              | oligopeptide transport ATP-binding protein                                    | 4.A   |
| YPO2237                                                                  | ----              | putative integral membrane protein                                            | 4.A   |
| YPO2835                                                                  | pstC              | putative phosphate transport system permease                                  | 4.A   |
| YPO2846                                                                  | ----              | putative ABC-transporter ATP-binding protein                                  | 4.A   |
| YPO3048                                                                  | ----              | probable ABC-transporter, ATP-binding protein                                 | 4.A   |
| YPO3049                                                                  | ----              | putative binding protein-dependent transport system, inner-membrane component | 4.A   |
| YPO3633                                                                  | ----              | putative periplasmic binding protein                                          | 4.A   |
| YPO3650                                                                  | ----              | putative metabolite transport protein                                         | 4.A   |
| YPO4111                                                                  | ----              | putative periplasmic solute-binding protein                                   | 4.A   |
| <b>Transport/binding proteins - amino acids and amines</b>               |                   |                                                                               |       |
| YPO1321                                                                  | sdaC, dcrA, b2796 | serine transporter                                                            | 4.A.1 |
| YPO1331                                                                  | potF              | putrescine-binding periplasmic protein precursor                              | 4.A.1 |
| YPO1332                                                                  | potG              | putrescine transport ATP-binding protein                                      | 4.A.1 |
| YPO1847                                                                  | yecS              | putative amino-acid ABC transporter (permease)                                | 4.A.1 |
| YPO1848                                                                  | yecC              | putative amino-acid ABC transporter (ATP-binding protein)                     | 4.A.1 |
| YPO2615                                                                  | glnH              | putative amino acid-binding protein precursor                                 | 4.A.1 |
| YPO2774                                                                  | hisJ              | histidine-binding periplasmic protein                                         | 4.A.1 |
| YPO3804                                                                  | livF              | high-affinity branched-chain amino acid transport, ATP-binding protein        | 4.A.1 |
| YPO3805                                                                  | livG              | high-affinity branched-chain amino acid transport, ATP-binding protein        | 4.A.1 |
| YPO3806                                                                  | livM              | high-affinity branched-chain amino acid transport system, permease protein    | 4.A.1 |
| YPO3807                                                                  | livH              | high-affinity branched-chain amino acid transport system, permease protein    | 4.A.1 |
| YPO3808                                                                  | livK, livJ        | branched-chain amino acid-binding protein                                     | 4.A.1 |
| YPO4109                                                                  | ----              | putative amino acid transport system permease                                 | 4.A.1 |
| <b>Transport/binding proteins - cations</b>                              |                   |                                                                               |       |
| YPO2061                                                                  | znuA              | exported high-affinity zinc uptake system protein                             | 4.A.2 |
| YPO2439                                                                  | yfeA              | periplasmic-binding protein                                                   | 4.A.2 |
| YPO2675                                                                  | ----              | putative potassium channel protein                                            | 4.A.2 |
| YPO3820                                                                  | ----              | putative P-type cation-translocating membrane ATPase                          | 4.A.2 |
| <b>Transport/binding proteins - carbohydrates, organics and alcohols</b> |                   |                                                                               |       |
| YPO0854                                                                  | ----              | putative maltodextrin permease protein                                        | 4.A.3 |
| YPO0858                                                                  | ----              | sugar transport ATP-binding protein                                           | 4.A.3 |
| YPO0959                                                                  | ----              | putative sugar ABC transporter periplasmic binding protein                    | 4.A.3 |
| YPO1384                                                                  | focA              | putative formate transporter 1                                                | 4.A.3 |
| YPO1507                                                                  | mgIB              | galactose-binding protein                                                     | 4.A.3 |
| YPO1508                                                                  | mgIA              | galactoside transport ATP-binding protein                                     | 4.A.3 |
| YPO1517                                                                  | ----              | putative sugar ABC transporter                                                | 4.A.3 |
| YPO1572                                                                  | ----              | putative sugar transporter                                                    | 4.A.3 |
| YPO1758                                                                  | manX, ptsL, gptB  | PTS system, mannose-specific IIB component                                    | 4.A.3 |
| YPO2501                                                                  | rbsB              | sugar binding protein precursor                                               | 4.A.3 |
| YPO2744                                                                  | fadL, ttr         | putative long-chain fatty acid transport protein                              | 4.A.3 |
| YPO2994                                                                  | ptsI              | PTS system, enzyme I component                                                | 4.A.3 |
| YPO3711                                                                  | lamB, malB        | maltoporin                                                                    | 4.A.3 |
| YPO3963                                                                  | ----              | sugar transport system permease protein                                       | 4.A.3 |
| YPO3992                                                                  | dctA              | C4-dicarboxylate transport protein                                            | 4.A.3 |
| YPO4037                                                                  | ----              | sugar-binding periplasmic protein                                             | 4.A.3 |
| <b>Transport/binding proteins - anions</b>                               |                   |                                                                               |       |
| YPO0159                                                                  | nirC              | putative nitrite transporter                                                  | 4.A.5 |
| YPO3014                                                                  | cysT              | sulfate transport system permease protein CysT                                | 4.A.5 |
| YPO3015                                                                  | cysP              | thiosulfate-binding protein                                                   | 4.A.5 |
| <b>Transport/binding proteins - other</b>                                |                   |                                                                               |       |
| YPO0261                                                                  | ----              | putative type III secretion apparatus                                         | 4.A.6 |

|                                                          |                     |                                                        |       |
|----------------------------------------------------------|---------------------|--------------------------------------------------------|-------|
| YPO1184                                                  | ----                | putative ABC transport membrane permease               | 4.A.6 |
| YPO2358                                                  | sapD                | peptide transport system ATP-binding protein           | 4.A.6 |
| YPO2359                                                  | sapF                | peptide transport system ATP-binding protein           | 4.A.6 |
| YPO2734                                                  | ccmA                | putative heme exporter protein A                       | 4.A.6 |
| YPO2736                                                  | ccmC                | putative heme exporter protein C                       | 4.A.6 |
| YPO2737                                                  | ccmD                | putative heme exporter protein D                       | 4.A.6 |
| YPO2983                                                  | nupC, cru           | nucleoside permease                                    | 4.A.6 |
| YPO3922                                                  | ----                | hemophore HasA                                         | 4.A.6 |
| YPO4003                                                  | dppA                | periplasmic dipeptide transport protein                | 4.A.6 |
| <b>Chaperones, chaperonins, heat shock</b>               |                     |                                                        |       |
| YPO1304                                                  | psaB                | chaperone protein PsaB precursor                       | 4.B   |
| YPO3881                                                  | ----                | putative chaperone protein                             | 4.B   |
| <b>Chemotaxis and mobility</b>                           |                     |                                                        |       |
| YPO0711                                                  | fliM                | putative flagellar motor switch protein                | 4.D   |
| YPO0727                                                  | flgF                | putative flagellar basal-body rod protein (pseudogene) | 4.D   |
| YPO0728                                                  | flgG                | putative flagellar basal-body rod protein              | 4.D   |
| YPO1799                                                  | flgB, flbA, fla FII | flagellar basal-body rod protein FlgB                  | 4.D   |
| YPO2760                                                  | flk                 | putative flagellar assembly regulatory protein, Flk    | 4.D   |
| <b>Detoxification</b>                                    |                     |                                                        |       |
| YPO1207                                                  | katA                | catalase                                               | 4.G   |
| YPO2386                                                  | sodB                | superoxide dismutase [Fe]                              | 4.G   |
| YPO3319                                                  | katY                | catalase-peroxidase                                    | 4.G   |
| <b>Pathogenicity</b>                                     |                     |                                                        |       |
| YPO0026                                                  | bipA, typA          | putative GTPase                                        | 4.I   |
| YPO3681                                                  | ----                | putative insecticidal toxin                            | 4.I   |
| <b>Other</b>                                             |                     |                                                        |       |
| <b>IS elements, Phage-related functions and prophage</b> |                     |                                                        |       |
| YPO2640                                                  | trp1400A            | IS1400 transposase A                                   | 5.A   |
| <b>Colicin-related functions</b>                         |                     |                                                        |       |
| YPO3886                                                  | ----                | colicin (partial)                                      | 5.B   |
| <b>Drug/analogue sensitivity</b>                         |                     |                                                        |       |
| YPO1949                                                  | tehB                | putative tellurite resistance protein                  | 5.D   |
| YPO3070                                                  | yfgD                | putative arsenate reductase                            | 5.D   |
| YPO3267                                                  | emrA                | multidrug resistance protein A                         | 5.D   |
| YPO4048                                                  | mdfA, cmr           | multidrug translocase                                  | 5.D   |
| <b>Adaptions and atypical conditions</b>                 |                     |                                                        |       |
| YPO1366                                                  | cspD, cspH          | cold shock-like protein                                | 5.F   |
| YPO1398                                                  | cspB                | cold shock-like protein                                | 5.F   |
| YPO2229                                                  | osmB                | osmotically inducible lipoprotein B precursor          | 5.F   |
| YPO2234                                                  | cstA                | putative carbon starvation protein A                   | 5.F   |
| YPO2659                                                  | cspB                | cold shock protein                                     | 5.F   |
| YPO3643                                                  | cspa2               | major cold shock protein Cspa2                         | 5.F   |
| YPO3644                                                  | cspa1               | major cold shock protein Cspa1                         | 5.F   |
| YPO3970                                                  | uspA                | universal stress protein A                             | 5.F   |
| <b>Unknown</b>                                           |                     |                                                        |       |
| YPO0131                                                  | ----                | conserved hypothetical protein                         | 5.I   |
| YPO0133                                                  | feoA                | hypothetical ferrous iron transport protein A          | 5.I   |
| YPO0190                                                  | ----                | conserved hypothetical protein                         | 5.I   |
| YPO0250                                                  | ----                | putative hydrolase (pseudogene)                        | 5.I   |
| YPO0284                                                  | ----                | conserved hypothetical protein                         | 5.I   |
| YPO0407                                                  | ----                | conserved hypothetical protein                         | 5.I   |
| YPO0408                                                  | ----                | putative aldolase                                      | 5.I   |
| YPO0434                                                  | ----                | putative metalloenzyme                                 | 5.I   |
| YPO0473                                                  | ----                | hypothetical protein                                   | 5.I   |
| YPO0498                                                  | ----                | hypothetical protein                                   | 5.I   |
| YPO0569a                                                 | ----                | conserved hypothetical protein                         | 5.I   |
| YPO0588                                                  | ----                | putative methyltransferase                             | 5.I   |
| YPO0628                                                  | ----                | putative translational inhibitor protein               | 5.I   |
| YPO0819                                                  | ----                | putative carbonic anhydrase                            | 5.I   |
| YPO0932                                                  | ----                | conserved hypothetical protein                         | 5.I   |
| YPO1069                                                  | ----                | conserved hypothetical protein                         | 5.I   |
| YPO1084                                                  | ----                | conserved hypothetical protein (pseudogene)            | 5.I   |
| YPO1244                                                  | ----                | hypothetical protein                                   | 5.I   |
| YPO1255                                                  | ----                | hypothetical protein                                   | 5.I   |
| YPO1277                                                  | ----                | putative cobalamin synthesis protein                   | 5.I   |
| YPO1316                                                  | ----                | putative iron/ascorbate oxidoreductase family protein  | 5.I   |
| YPO1501                                                  | ----                | putative esterase                                      | 5.I   |
| YPO1516                                                  | ----                | hypothetical protein                                   | 5.I   |
| YPO1565                                                  | ----                | putative oxidoreductase                                | 5.I   |
| YPO1566                                                  | ----                | putative hydrolase                                     | 5.I   |
| YPO1573                                                  | ----                | putative polysaccharide deacetylase                    | 5.I   |
| YPO1649                                                  | ----                | conserved hypothetical protein                         | 5.I   |
| YPO1996                                                  | ----                | hypothetical protein                                   | 5.I   |

|         |                  |                                                                 |     |
|---------|------------------|-----------------------------------------------------------------|-----|
| YPO2080 | ----             | conserved hypothetical protein                                  | 5.1 |
| YPO2191 | ----             | hypothetical protein                                            | 5.1 |
| YPO2233 | ----             | conserved hypothetical protein                                  | 5.1 |
| YPO2290 | ----             | putative virulence factor                                       | 5.1 |
| YPO2348 | ----             | conserved hypothetical protein                                  | 5.1 |
| YPO2360 | ----             | conserved hypothetical protein                                  | 5.1 |
| YPO2410 | ----             | Conserved hypothetical protein                                  | 5.1 |
| YPO2436 | ----             | hypothetical protein                                            | 5.1 |
| YPO2460 | ----             | conserved hypothetical protein                                  | 5.1 |
| YPO2577 | ----             | putative aldehyde dehydrogenase                                 | 5.1 |
| YPO2590 | ----             | hypothetical protein                                            | 5.1 |
| YPO2795 | ----             | hypothetical protein                                            | 5.1 |
| YPO2894 | ----             | conserved hypothetical protein                                  | 5.1 |
| YPO2895 | nifU             | NifU family protein                                             | 5.1 |
| YPO2962 | ----             | conserved hypothetical protein                                  | 5.1 |
| YPO2976 | ----             | conserved hypothetical protein                                  | 5.1 |
| YPO3071 | ----             | conserved hypothetical protein                                  | 5.1 |
| YPO3128 | ----             | conserved hypothetical protein                                  | 5.1 |
| YPO3139 | ----             | putative 6-O-methylguanine DNA methyltransferase family protein | 5.1 |
| YPO3151 | ----             | conserved hypothetical protein                                  | 5.1 |
| YPO3336 | ----             | conserved hypothetical protein                                  | 5.1 |
| YPO3484 | ----             | conserved hypothetical protein                                  | 5.1 |
| YPO3488 | deaD, csdA, mssB | cold-shock dead-box protein A                                   | 5.1 |
| YPO3498 | ----             | conserved hypothetical protein                                  | 5.1 |
| YPO3527 | ----             | conserved hypothetical protein                                  | 5.1 |
| YPO3607 | ----             | conserved hypothetical protein                                  | 5.1 |
| YPO3647 | ----             | conserved hypothetical protein                                  | 5.1 |
| YPO3662 | ----             | conserved hypothetical protein                                  | 5.1 |
| YPO3708 | ----             | conserved hypothetical protein                                  | 5.1 |
| YPO3803 | ----             | hypothetical protein                                            | 5.1 |
| YPO3887 | ----             | hypothetical protein                                            | 5.1 |
| YPO3966 | ----             | conserved hypothetical protein                                  | 5.1 |
| YPO4064 | ----             | hypothetical protein                                            | 5.1 |

**pCD1**

| Systematic                | Common | Function                     | Code |
|---------------------------|--------|------------------------------|------|
| <b>Type III secretion</b> |        |                              |      |
| yscA                      |        | type III secretion component |      |
| yscB                      |        | type III secretion component |      |
| yscC                      |        | type III secretion component |      |
| yscD                      |        | type III secretion component |      |
| yscE                      |        | type III secretion component |      |
| yscF                      |        | type III secretion component |      |
| yscH                      |        | type III secretion component |      |
| yscI                      |        | type III secretion component |      |
| yscJ                      |        | type III secretion component |      |
| yscK                      |        | type III secretion component |      |
| yscN                      |        | type III secretion component |      |
| yscO                      |        | type III secretion component |      |
| yscQ                      |        | type III secretion component |      |
| yscR                      |        | type III secretion component |      |
| yscS                      |        | type III secretion component |      |
| yscT                      |        | type III secretion component |      |
| yscU                      |        | type III secretion component |      |
| yscX                      |        | type III secretion component |      |
| yscY                      |        | type III secretion component |      |
| lcrD                      |        | type III secretion component |      |
| lcrF                      |        | type III secretion component |      |
| lcrG                      |        | type III secretion component |      |
| lcrH                      |        | type III secretion component |      |
| lcrR                      |        | type III secretion component |      |
| lcrV                      |        | type III secretion component |      |
| sycN                      |        | type III secretion component |      |
| sycT                      |        | type III secretion component |      |
| tyeA                      |        | type III secretion component |      |
| virG                      |        | type III secretion component |      |
| yopB                      |        | type III secretion component |      |
| yopD                      |        | type III secretion component |      |
| yopE                      |        | type III secretion component |      |
| yopH                      |        | type III secretion component |      |
| yopK                      |        | type III secretion component |      |
| yopP                      |        | type III secretion component |      |
| yopT                      |        | type III secretion component |      |

|                |                              |  |
|----------------|------------------------------|--|
| ypkA           | type III secretion component |  |
| <b>Unknown</b> |                              |  |
| YPCD1.03c      |                              |  |
| YPCD1.15c      |                              |  |
| YPCD1.16c      |                              |  |
| YPCD1.18c      |                              |  |
| YPCD1.70c      |                              |  |
| YPCD1.73c      |                              |  |
| YPCD1.75c      |                              |  |
| YPCD1.81       |                              |  |
| YPCD1.82c      |                              |  |
| YPCD1.83c      |                              |  |
| YPCD1.85       |                              |  |

|                   |               |                 |             |
|-------------------|---------------|-----------------|-------------|
| <b>pMT1</b>       |               |                 |             |
| <b>Systematic</b> | <b>Common</b> | <b>Function</b> | <b>Code</b> |
| YPMT1.34          |               |                 |             |
| YPMT1.42          |               |                 |             |
| YPMT1.86A         |               |                 |             |
| YPMT1.86c         |               |                 |             |

|                   |               |                                        |             |
|-------------------|---------------|----------------------------------------|-------------|
| <b>pPCP1</b>      |               |                                        |             |
| <b>Systematic</b> | <b>Common</b> | <b>Function</b>                        | <b>Code</b> |
| pim               |               | pesticin immunity protein              |             |
| pla               |               | fibrinolysin/coagulase precursor       |             |
| rop               |               | plasmid replication regulatory protein |             |
| YPPCP1.06         |               |                                        |             |

\*Gene list is sorted by functional classification (chromosome) and the three plasmids.

†Functional classification based on CO92 chromosomal annotation ([www.sanger.ac.uk/Projects/Y\\_pestis/Yp\\_gene\\_list\\_hierarchical.shtml](http://www.sanger.ac.uk/Projects/Y_pestis/Yp_gene_list_hierarchical.shtml)).

‡ORFs highlighted in yellow are up-regulated in the mouse lung compared with BHI broth at 37°C, and ORFs in gray are down-regulated.
