# Supplementary material
Source: PubMed Central journal article supplement (PMC1308902)

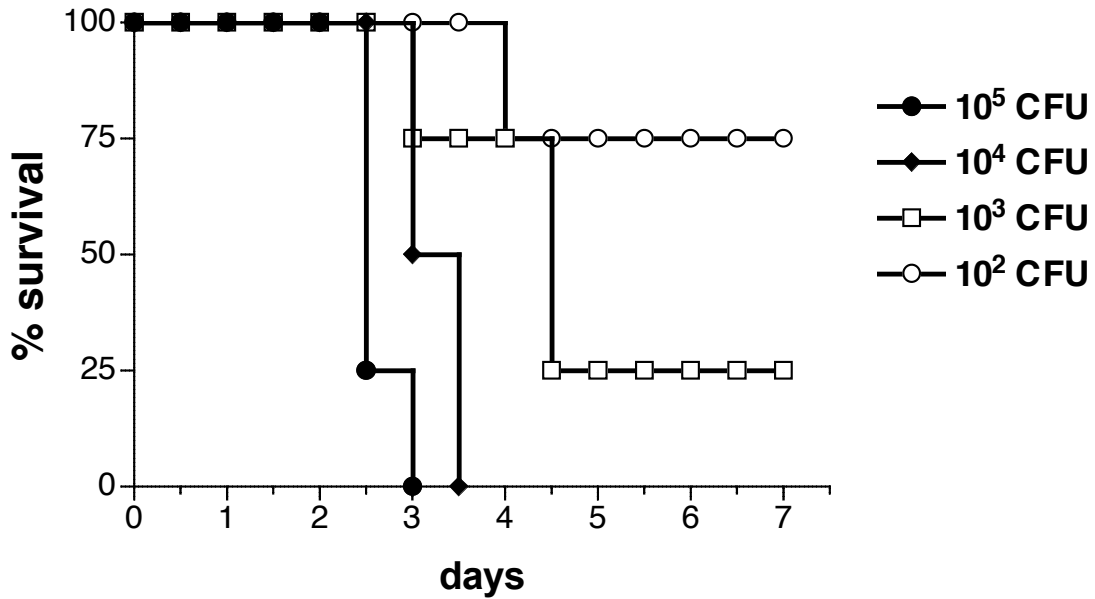

Supplement: pnas_0506840102_1.pdf [file pnas_0506840102_1.pdf]

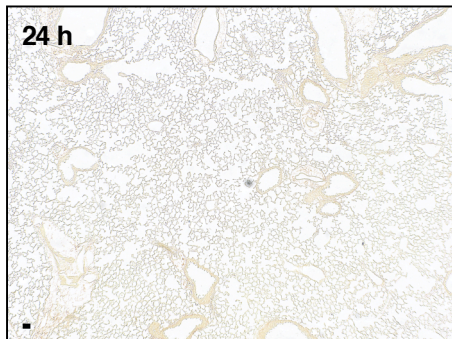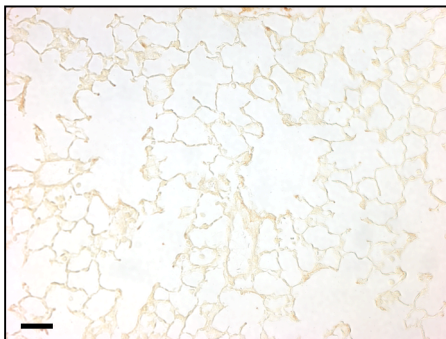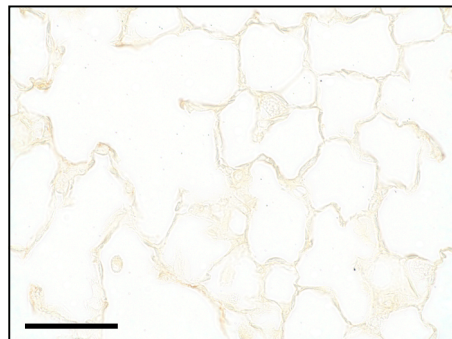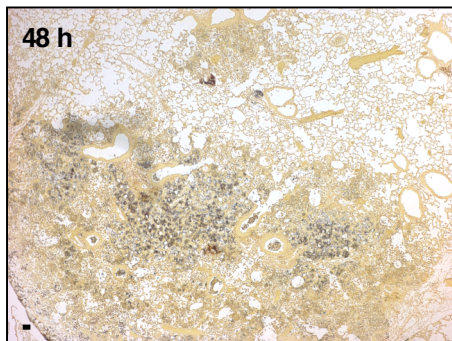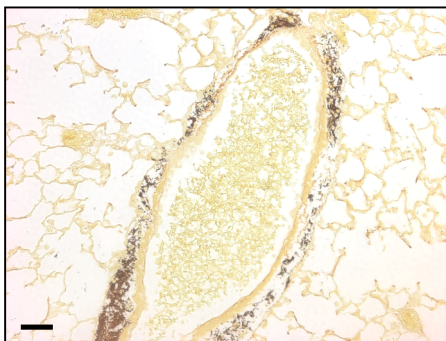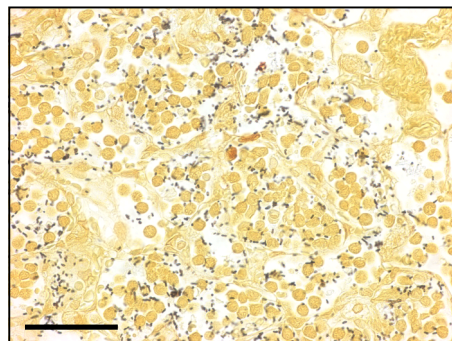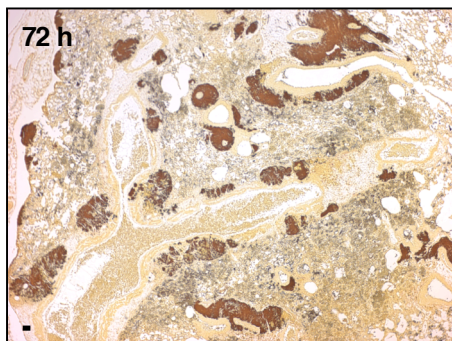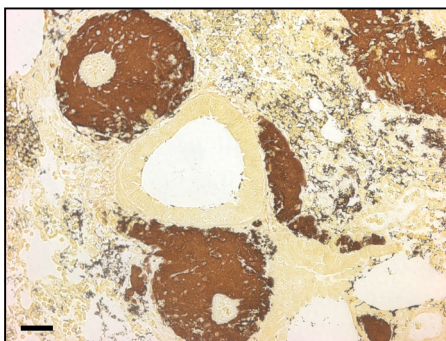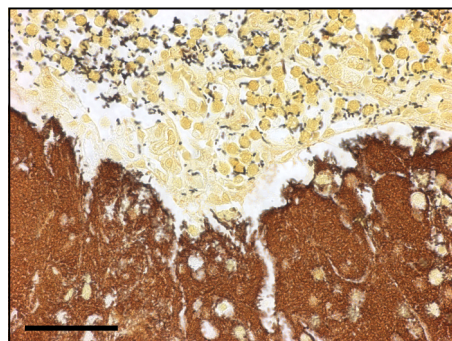

Supplement: pnas_0506840102_2.pdf [file pnas_0506840102_2.pdf]

**A.**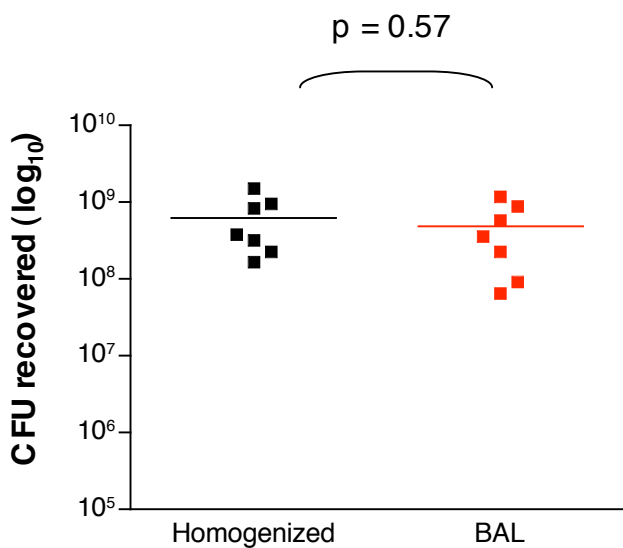**B.**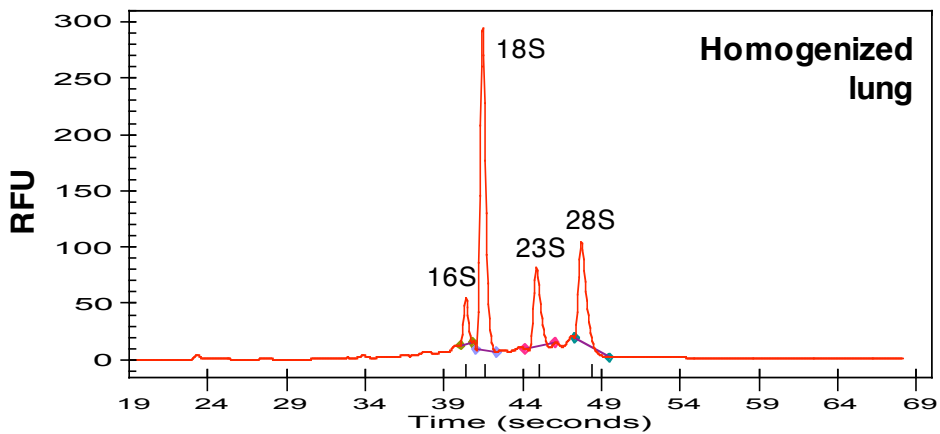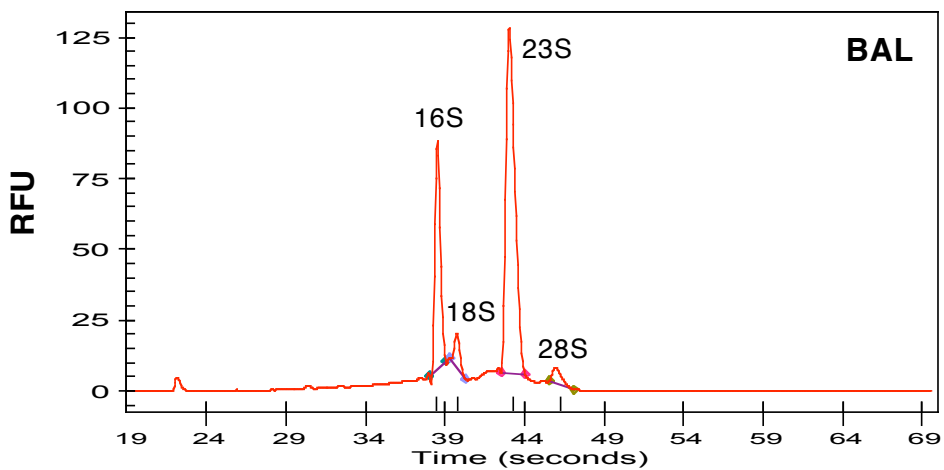

Supplement: pnas_0506840102_3.pdf [file pnas_0506840102_3.pdf]

fold change  
(48 h lung:37°C BHI broth)

microarray  
qRT-PCR

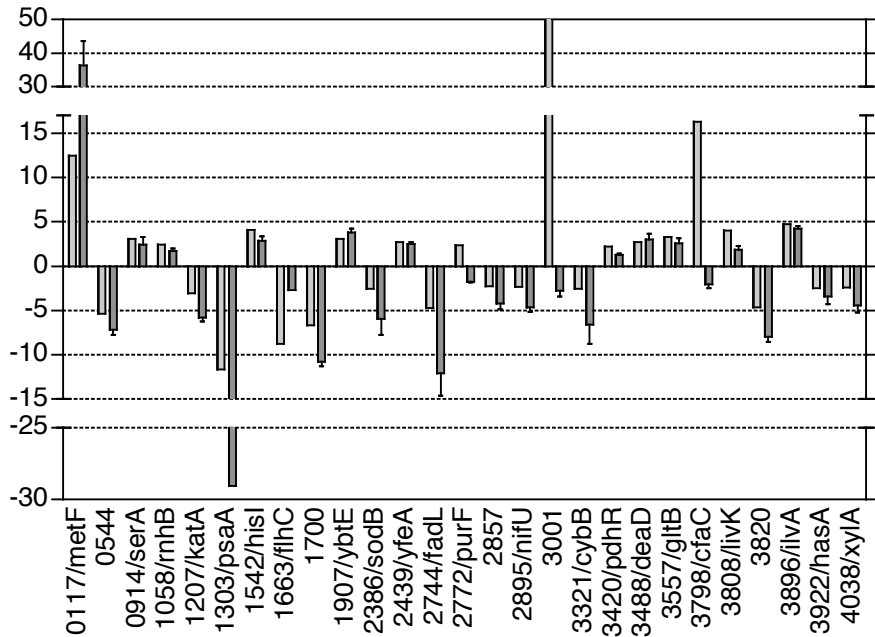

ORF

Supplement: pnas_0506840102_4.pdf [file pnas_0506840102_4.pdf]
